# Supplementary material
Source: publisher figshare collection journal article supplement (https://acs.figshare.com/ndownloader/files/4652491)
Supplement: Supplementary file 1 [file 4652491]

## Supporting Information

### Organocatalytic Synthesis of *N*-Phenylisoxazolidin-5-ones and a One-Pot Synthesis of $\beta$ -Amino Acid Esters

Jayasree Seayad, Pranab K. Patra, Yugen Zhang,\* and Jackie Y. Ying\*

*Institute of Bioengineering and Nanotechnology*

*31 Biopolis Way, The Nanos, Singapore 138669*

**General:** Reactions were monitored by thin layer chromatography using 0.25-mm E. Merck silica gel coated glass plates (60F-254) with UV light to visualize the course of reaction. Flash column chromatography was performed using CombiFlash (ISCO, Inc.). Chemical yields referred to the pure isolated substances. Gas chromatography-mass spectrometry (GC-MS) was performed with Shimadzu GC-2010 coupled with GCMS-QP2010.  $^1\text{H}$  and  $^{13}\text{C}$  NMR spectra were obtained using a Bruker AV-400 (400 MHz) spectrometer. Chemical shifts were reported in ppm from tetramethylsilane with the solvent resonance as the internal standard. Data were reported in the following order: chemical shift in ppm ( $\delta$ ) (multiplicity were indicated by br (broadened), s (singlet), d (doublet), t (triplet), q (quartet), m (multiplet),  $m_c$  (centered multiplet)); coupling constants ( $J$ , Hz); integration; assignment. All reactions were performed in oven-dried (140°C) or flame-dried glassware under an inert atmosphere of dry  $\text{N}_2$  or Ar. All solvents were anhydrous and purchased from Aldrich or Fluka.

**Procedure for the NHC-catalyzed synthesis of  $\beta$ -aminoesters:**  $\text{KO}^t\text{Bu}$  (0.2 mmol) was added under Ar to a solution of  $\alpha,\beta$ -unsaturated aldehyde (1 mmol), nitrosobenzene (1.1 mmol) and the catalyst (0.1–0.2 mmol) in dichloromethane (2 mL). The reaction mixture was stirred at room temperature for 1–6 h. The solvent was removed under vacuum, and the residue was diluted with methanol (3 mL), followed by the addition of perchloric acid (3–5 drops). The mixture was stirred at room temperature overnight. The solvent was removed *in vacuo*, and the residue was diluted with  $\text{CH}_2\text{Cl}_2$  (5 mL) and saturated aqueous  $\text{NaHCO}_3$  (10 mL). The aqueous layer was extracted with  $\text{CH}_2\text{Cl}_2$  (10 mL  $\times$  2). The combined organic layer was washed with saturated aqueous  $\text{NaHCO}_3$  (10 mL) and then brine (10 mL), dried ( $\text{MgSO}_4$ ), and concentrated. The pure product was obtained through flash silica gel column chromatography of the residue using hexane and ethyl acetate as the eluents.

**Methyl 3-(4-methoxyphenylamino)-3-phenylpropanoate (9a):** Potassium *tert*-butoxide (22.4 mg, 0.2 mmol) was added to a solution of (*E*)-cinnamaldehyde (132 mg, 1 mmol), nitrosobenzene (117 mg, 1.1 mmol) and the catalyst (85 mg, 0.2 mmol) in dichloromethane (2 mL). The reaction mixture was stirred at room temperature for 6 h. The solvent was removed under vacuum, and the residue was diluted with methanol (3 mL), followed by the addition of perchloric acid (3–5 drops). The mixture was stirred at room temperature overnight. The solvent was removed *in vacuo*, and the residue was diluted with CH<sub>2</sub>Cl<sub>2</sub> (5 mL) and saturated aqueous NaHCO<sub>3</sub> (10 mL). The aqueous layer was extracted with CH<sub>2</sub>Cl<sub>2</sub> (10 mL × 2). The combined organic layer was washed with saturated aqueous NaHCO<sub>3</sub> (10 mL) and then brine (10 mL), dried (MgSO<sub>4</sub>), and concentrated. The pure product was obtained through flash silica gel column chromatography of the residue using hexane and ethyl acetate as the eluents.

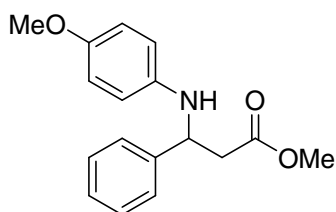

<sup>1</sup>H NMR (400 MHz, CDCl<sub>3</sub>): δ 7.39–7.25 (m, 5H, Ar-H), 6.71 (AB, d, *J*<sub>AB</sub> = 8.4 Hz, 2H, Ar-H), 6.56 (AB, d, *J*<sub>AB</sub> = 8.4 Hz, 2H, Ar-H), 4.77 (t, *J* = 6.4 Hz, 1H, CH), 4.32 (br s, 1H, NH), 3.71 (s, 3H, CH<sub>3</sub>), 3.66 (s, 3H, CH<sub>3</sub>), 2.84 (d, *J* = 6.4 Hz, 2H, CH<sub>2</sub>). <sup>13</sup>C NMR (100 MHz, CDCl<sub>3</sub>): δ 171.7 (Cq, CO), 152.6, 142.0, 140.3 (Cq), 128.8, 127.5, 126.4 (C-Ar), 115.6, 114.7 (C-Ar), 56.2, 55.7 (OCH<sub>3</sub>), 51.9 (CH), 42.5 (CH<sub>2</sub>). MS (ESI): *m/z* 285 (M<sup>+</sup>), 212, 122.

**Methyl 3-(4-methoxyphenylamino)-3-(4-nitrophenyl)propanoate (9b):** Potassium *tert*-butoxide (11.2 mg, 0.1 mmol) was added to a solution of (*E*)-4-nitrocinnamaldehyde (177 mg, 1 mmol), nitrosobenzene (117 mg, 1.1 mmol) and the catalyst (42.5 mg, 0.1 mmol) in dichloromethane (2 mL). The reaction mixture was stirred at room temperature for 3 h. The solvent was removed under vacuum, and the residue was diluted with methanol (3 mL), followed by the addition of perchloric acid (3–5 drops). The mixture was stirred at room temperature overnight. The solvent was removed *in vacuo*, and the residue was diluted with CH<sub>2</sub>Cl<sub>2</sub> (5 mL) and saturated aqueous NaHCO<sub>3</sub> (10 mL). The aqueous layer was extracted with CH<sub>2</sub>Cl<sub>2</sub> (10 mL × 2). The combined organic layer was washed with saturated aqueous NaHCO<sub>3</sub> (10 mL) and then by brine (10 mL), dried (MgSO<sub>4</sub>), and concentrated. The pure

product was obtained through flash silica gel column chromatography of the residue using hexane and ethyl acetate as the eluents.

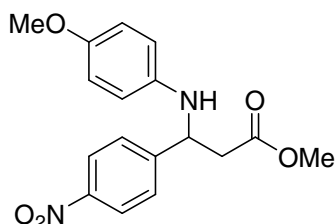

$^1\text{H}$  NMR (400 MHz,  $\text{CDCl}_3$ ):  $\delta$  8.18 (AB, d,  $J_{AB}$  = 8.6 Hz, 2H, Ar-H), 7.57 (AB, d,  $J_{AB}$  = 8.6 Hz, 2H, Ar-H), 6.70 (AB, d,  $J_{AB}$  = 8.8 Hz, 2H, Ar-H), 6.48 (AB, d,  $J_{AB}$  = 8.8 Hz, 2H, Ar-H), 4.87 (br t,  $J$  = 6.6 Hz, 1H, CH), 4.30 (br s, 1H, NH), 3.70 (s, 3H,  $\text{CH}_3$ ), 3.67 (s, 3H,  $\text{CH}_3$ ), 2.83 (dd,  $J$  = 2.0, 6.6 Hz, 2H,  $\text{CH}_2$ ).  $^{13}\text{C}$  NMR (100 MHz,  $\text{CDCl}_3$ ):  $\delta$  171.1 (Cq, CO), 152.7, 150.2, 147.3, 140.1 (Cq), 127.4, 124.1 (C-Ar), 115.2, 114.8 (C-Ar), 55.6, 55.3 ( $\text{OCH}_3$ ), 52.1 (CH), 42.1 ( $\text{CH}_2$ ). MS (ESI):  $m/z$  330 ( $\text{M}^+$ ), 257, 211, 122, 108.

**Methyl 3-(4-methoxyphenylamino)-3-(2-nitrophenyl)propanoate (9c):** Potassium *tert*-butoxide (22.4 mg, 0.2 mmol) was added to a solution of (*E*)-2-nitrocinnamaldehyde (177 mg, 1 mmol), nitrosobenzene (117 mg, 1.1 mmol) and the catalyst (85 mg, 0.2 mmol) in dichloromethane (2 mL). The reaction mixture was stirred at room temperature for 6 h. The solvent was removed under vacuum, and the residue was diluted with methanol (3 mL), followed by the addition of perchloric acid (3–5 drops). The mixture was stirred at room temperature overnight. The solvent was removed *in vacuo*, and the residue was diluted with  $\text{CH}_2\text{Cl}_2$  (5 mL) and saturated aqueous  $\text{NaHCO}_3$  (10 mL). The aqueous layer was extracted with  $\text{CH}_2\text{Cl}_2$  (10 mL  $\times$  2). The combined organic layer was washed with saturated aqueous  $\text{NaHCO}_3$  (10 mL) and then brine (10 mL), dried ( $\text{MgSO}_4$ ), and concentrated. The pure product was obtained through flash silica gel column chromatography of the residue using hexane and ethyl acetate as the eluents.

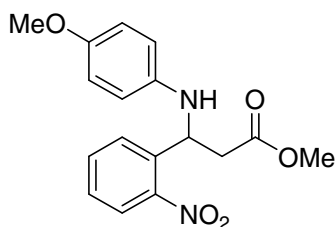

$^1\text{H}$  NMR (400 MHz,  $\text{CDCl}_3$ ):  $\delta$  7.97 (dd,  $J$  = 1.2, 8.0 Hz, 1H, Ar-H), 7.73 (dd,  $J$  = 1.2, 8.0 Hz, 1H, Ar-H), 7.56 (dt,  $J$  = 1.2, 8.0 Hz, 1H, Ar-H), 7.41 (dt,  $J$  = 1.2, 8.0 Hz, 1H, Ar-H), 6.68 (AB, d,  $J_{AB}$  = 8.8 Hz, 2H, Ar-H), 6.45 (AB, d,  $J_{AB}$  = 8.8 Hz, 2H, Ar-H), 5.40 (dd,  $J$  = 4.3, 7.9 Hz, 1H, CH), 4.30 (br s, 1H, NH), 3.69 (s, 3H,  $\text{OCH}_3$ ), 3.67 (s, 3H,  $\text{OCH}_3$ ), 3.04 (dd,  $J$  =

4.3, 15.3 Hz, 1H, CH<sub>2</sub>), 2.81 (dd,  $J = 7.9, 15.3$  Hz, 1H, CH<sub>2</sub>). <sup>13</sup>C NMR (100 MHz, CDCl<sub>3</sub>):  $\delta$  171.4 (Cq, CO), 152.6, 148.9, 140.0, 137.7 (Cq), 133.6, 128.6, 128.4, 125.0 (C-Ar), 116.4, 114.8 (C-Ar), 55.6, 52.0 (OCH<sub>3</sub>), 51.4 (CH), 41.2 (CH<sub>2</sub>). MS (ESI):  $m/z$  330 (M<sup>+</sup>), 296, 257, 237, 122, 108.

**Methyl 3-(2-methoxyphenylamino)-3-(2-nitrophenyl)propanoate (9c'):**

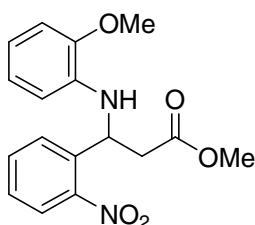

<sup>1</sup>H NMR (400 MHz, CDCl<sub>3</sub>):  $\delta$  7.98 (dd,  $J = 1.1, 8.0$  Hz, 1H, Ar-H), 7.69 (dd,  $J = 1.1, 8.0$  Hz, 1H, Ar-H), 7.54 (dt,  $J = 1.1, 8.0$  Hz, 1H, Ar-H), 7.40 (dt,  $J = 1.1, 8.0$  Hz, 1H, Ar-H), 6.77 (dd,  $J = 1.9, 7.6$  Hz, 1H, Ar-H), 6.67 (dq,  $J = 2.0, 7.6$  Hz, 2H, Ar-H), 6.25 (dd,  $J = 1.9, 7.6$  Hz, 1H, Ar-H), 5.53 (br dd,  $J = 4.3, 7.9$  Hz, 1H, CH), 5.39 (br d,  $J = 6.4$  Hz, 1H, NH), 3.90 (s, 3H, OCH<sub>3</sub>), 3.69 (s, 3H, OCH<sub>3</sub>), 3.08 (dd,  $J = 4.3, 15.3$  Hz, 1H, CH<sub>2</sub>), 2.86 (dd,  $J = 7.9, 15.3$  Hz, 1H, CH<sub>2</sub>). <sup>13</sup>C NMR (100 MHz, CDCl<sub>3</sub>):  $\delta$  171.1 (Cq, CO), 148.8, 146.9, 137.8, 135.7 (Cq), 133.7, 128.4, 128.3, 125.0, 121.1, 117.5, 110.8, 109.6 (C-Ar), 55.6, 52.0 (OCH<sub>3</sub>), 50.3 (CH), 41.5 (CH<sub>2</sub>). MS (ESI):  $m/z$  330 (M<sup>+</sup>), 257, 207, 123, 108.

**4-(2-(methoxycarbonyl)-1-(4-methoxyphenylamino)ethyl)-2-bromophenyl**

**trifluoro-methanesulfonate (9d):** Potassium *tert*-butoxide (22.4 mg, 0.2 mmol) was added to a solution of (*E*)-3-bromo-4-trifluoromethylsulfonyloxycinnamaldehyde (357 mg, 1 mmol), nitrosobenzene (117 mg, 1.1 mmol) and the catalyst (85 mg, 0.2 mmol) in dichloromethane (2 mL). The reaction mixture was stirred at room temperature for 6 h. The solvent was removed under vacuum, and the residue was diluted with methanol (3 mL), followed by the addition of perchloric acid (3–5 drops). The mixture was stirred at room temperature overnight. The solvent was removed *in vacuo*, and the residue was diluted with CH<sub>2</sub>Cl<sub>2</sub> (5 mL) and saturated aqueous NaHCO<sub>3</sub> (10 mL). The aqueous layer was extracted with CH<sub>2</sub>Cl<sub>2</sub> (10 mL  $\times$  2). The combined organic layer was washed with saturated aqueous NaHCO<sub>3</sub> (10 mL) and then brine (10 mL), dried (MgSO<sub>4</sub>), and concentrated. The pure product was obtained through flash silica gel column chromatography of the residue using hexane and ethyl acetate as the eluents.

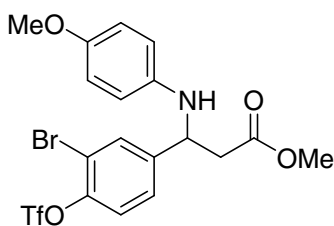

$^1\text{H}$  NMR (400 MHz,  $\text{CDCl}_3$ ):  $\delta$  7.73 (d,  $J = 2.2$  Hz, 2H, Ar-H), 7.42 (dd,  $J = 2.2$ , 8.5 Hz, 1H, Ar-H), 7.29 (d,  $J = 8.5$  Hz, 2H, Ar-H), 6.73 (AB, d,  $J_{AB} = 8.9$  Hz, 2H, Ar-H), 6.48 (AB, d,  $J_{AB} = 8.8$  Hz, 2H, Ar-H), 4.74 (dd,  $J = 6.2$ , 6.5 Hz, 1H, CH), 4.38 (br s, 1H, NH), 3.72 (s, 3H,  $\text{OCH}_3$ ), 3.68 (s, 3H,  $\text{OCH}_3$ ), 2.78 (ddd,  $J = 3.9$ , 6.2, 6.5 Hz, 2H,  $\text{CH}_2$ ).  $^{13}\text{C}$  NMR (100 MHz,  $\text{CDCl}_3$ ):  $\delta$  171.1 (Cq, CO), 164.6 (d,  $J = 12.5$  Hz), 162.1 (d,  $J = 12.5$  Hz), 152.6, 151.6, 147.1 (d,  $J = 15.4$  Hz), 140.3, 115.1, 114.8, 109.2 (d,  $J = 25.4$  Hz), 102.9 (t,  $J = 25.4$  Hz), 55.7, 55.3 ( $\text{OCH}_3$ ), 52.0 (CH), 42.3 ( $\text{CH}_2$ ). MS (ESI):  $m/z$  513 ( $\text{M}^+$ ), 440, 305, 122.

**Methyl 4-(2-methoxycarbonyl)-1-(4-methoxyphenylamino)ethyl benzoate (9e):**

Potassium *tert*-butoxide (22.4 mg, 0.2 mmol) was added to a solution of (*E*)-4-methoxycarbonylcinnamaldehyde (190 mg, 1 mmol), nitrosobenzene (117 mg, 1.1 mmol) and the catalyst (85 mg, 0.2 mmol) in dichloromethane (2 mL). The reaction mixture was stirred at room temperature for 6 h. The solvent was removed under vacuum, and the residue was diluted with methanol (3 mL), followed by the addition of perchloric acid (3–5 drops). The mixture was stirred at room temperature overnight. The solvent was removed *in vacuo*, and the residue was diluted with  $\text{CH}_2\text{Cl}_2$  (5 mL) and saturated aqueous  $\text{NaHCO}_3$  (10 mL). The aqueous layer was extracted with  $\text{CH}_2\text{Cl}_2$  (10 mL  $\times$  2). The combined organic layer was washed with saturated aqueous  $\text{NaHCO}_3$  (10 mL) and then brine (10 mL), dried ( $\text{MgSO}_4$ ), and concentrated. The pure product was obtained through flash silica gel column chromatography of the residue using hexane and ethyl acetate as the eluents.

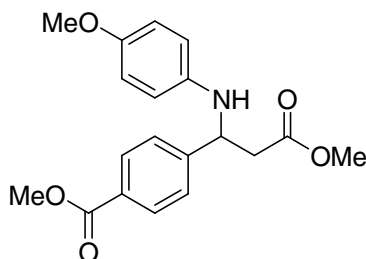

$^1\text{H}$  NMR (400 MHz,  $\text{CDCl}_3$ ):  $\delta$  8.00 (AB,  $J_{AB} = 8.2$  Hz, 2H, Ar-H), 7.45 (AB,  $J_{AB} = 8.2$  Hz, 2H, Ar-H), 6.69 (AB, d,  $J_{AB} = 8.4$  Hz, 2H, Ar-H), 6.50 (AB, d,  $J_{AB} = 8.4$  Hz, 2H, Ar-H), 4.81 (br t,  $J = 6.6$  Hz, 1H, CH), 4.25 (br s, 1H, NH), 3.90 (s, 3H,  $\text{CH}_3$ ), 3.69 (s, 3H,  $\text{CH}_3$ ), 3.65 (s, 3H,  $\text{CH}_3$ ), 2.80 (dd,  $J = 1.5$ , 6.6 Hz, 2H,  $\text{CH}_2$ ).  $^{13}\text{C}$  NMR (100 MHz,  $\text{CDCl}_3$ ):  $\delta$  171.4,

166.8 (Cq, CO), 152.5, 147.8, 140.5, 129.4 (Cq), 130.1, 126.4, 115.2, 114.8 (C-Ar), 55.7, 55.6, 52.1, 52.0 (OCH<sub>3</sub>, CH), 42.3 (CH<sub>2</sub>). MS (ESI): *m/z* 343 (M<sup>+</sup>), 270, 122, 108.

**Methyl 6-(2-methoxycarbonyl)-1-(4-methoxyphenylamino)ethyl)naphthalene-2-carboxylate (9f):** Potassium *tert*-butoxide (22.4 mg, 0.2 mmol) was added to a solution of methyl (*E*)-6-(2-formylvinyl)naphthalene-2-carboxylate (240 mg, 1 mmol), nitrosobenzene (117 mg, 1 mmol) and the catalyst (85 mg, 0.2 mmol) in dichloromethane (2 mL). The reaction mixture was stirred at room temperature for 6 h. The solvent was removed under vacuum, and the residue was diluted with methanol (3 mL), followed by the addition of perchloric acid (3–5 drops). The mixture was stirred at room temperature overnight. The solvent was removed *in vacuo* and the residue was diluted with CH<sub>2</sub>Cl<sub>2</sub> (5 mL) and saturated aqueous NaHCO<sub>3</sub> (10 mL). The aqueous layer was extracted with CH<sub>2</sub>Cl<sub>2</sub> (10 mL × 2). The combined organic layer was washed with saturated aqueous NaHCO<sub>3</sub> (10 mL) and then brine (10 mL), dried (MgSO<sub>4</sub>), and concentrated. The pure product was obtained through flash silica gel column chromatography of the residue using hexane and ethyl acetate as the eluents.

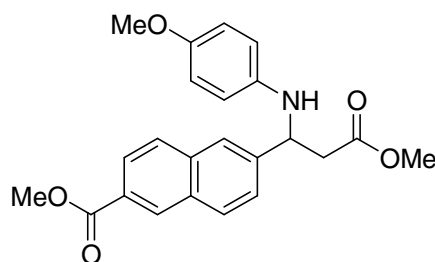

<sup>1</sup>H NMR (400 MHz, CDCl<sub>3</sub>):  $\delta$  8.58 (s, 1H, Ar-H), 8.05 (dd, *J* = 1.7, 8.5 Hz, 1H, Ar-H), 7.93 (d, *J* = 8.5 Hz, 1H, Ar-H), 7.88 (s, 1H, Ar-H), 7.84 (d, *J* = 8.5 Hz, 1H, Ar-H), 7.57 (dd, *J* = 1.7, 8.5 Hz, 1H, Ar-H), 6.69 (AB, d, *J*<sub>AB</sub> = 8.4 Hz, 2H, Ar-H), 6.57 (AB, d, *J*<sub>AB</sub> = 8.4 Hz, 2H, Ar-H), 4.94 (dd, *J* = 5.2, 6.7 Hz, 1H, CH), 4.30 (br s, 1H, NH), 3.98 (s, 3H, CH<sub>3</sub>), 3.68 (s, 3H, CH<sub>3</sub>), 3.67 (s, 3H, CH<sub>3</sub>), 2.84 (dd, *J* = 3.0, 5.2, 6.7 Hz, 2H, CH<sub>2</sub>). <sup>13</sup>C NMR (100 MHz, CDCl<sub>3</sub>):  $\delta$  171.5, 167.2 (Cq, CO), 152.4, 142.7, 140.7, 135.6, 132.0 (Cq), 130.8, 130.1, 128.2 (C-Ar), 127.3 (Cq), 125.6, 125.2, 125.0 (C-Ar), 115.2, 114.8 (C-Ar), 56.0, 55.7, 52.0 (OCH<sub>3</sub>), 52.3 (CH), 42.5 (CH<sub>2</sub>).

**Methyl 3-(4-methoxyphenylamino)-3-(4-cyanophenyl)propanoate (9g):** Potassium *tert*-butoxide (22.4 mg, 0.2 mmol) was added to a solution of (*E*)-4-cyanocinnamaldehyde (157 mg, 1 mmol), nitrosobenzene (117 mg, 1.1 mmol) and the catalyst (85 mg, 0.2 mmol) in

dichloromethane (2 mL). The reaction mixture was stirred at room temperature for 6 h. The solvent was removed under vacuum, and the residue was diluted with methanol (3 mL), followed by the addition of perchloric acid (3–5 drops). The mixture was stirred at room temperature overnight. The solvent was removed *in vacuo*, and the residue was diluted with CH<sub>2</sub>Cl<sub>2</sub> (5 mL) and saturated aqueous NaHCO<sub>3</sub> (10 mL). The aqueous layer was extracted with CH<sub>2</sub>Cl<sub>2</sub> (10 mL × 2). The combined organic layer was washed with saturated aqueous NaHCO<sub>3</sub> (10 mL) and then brine (10 mL), dried (MgSO<sub>4</sub>), and concentrated. The pure product was obtained through flash silica gel column chromatography of the residue using hexane and ethyl acetate as the eluents.

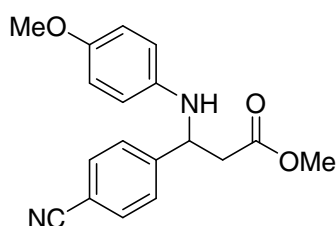

<sup>1</sup>H NMR (400 MHz, CDCl<sub>3</sub>): δ 7.63 (AB, d,  $J_{AB}$  = 8.4 Hz, 2H, Ar-H), 7.51 (AB, d,  $J_{AB}$  = 8.4 Hz, 2H, Ar-H), 6.71 (AB, d,  $J_{AB}$  = 9.0 Hz, 2H, Ar-H), 6.47 (AB, d,  $J_{AB}$  = 9.0 Hz, 2H, Ar-H), 4.80 (dd,  $J$  = 4.5, 6.5 Hz, 1H, CH), 4.38 (br s, 1H, NH), 3.71 (s, 3H, OCH<sub>3</sub>), 3.67 (s, 3H, OCH<sub>3</sub>), 2.81 (ddd,  $J$  = 2.7, 4.5, 6.5 Hz, 2H, CH<sub>2</sub>). <sup>13</sup>C NMR (100 MHz, CDCl<sub>3</sub>): δ 171.1 (Cq, CO), 152.7, 148.1, 140.1 (Cq), 132.7, 127.2 (C-Ar), 118.7 (Cq), 111.4 (Cq, CN), 115.2, 114.8 (C-Ar), 55.7, 55.5 (OCH<sub>3</sub>), 52.1 (CH), 42.1 (CH<sub>2</sub>). MS (ESI):  $m/z$  310 (M<sup>+</sup>), 237, 122.

**Methyl 3-(4-methoxyphenylamino)-3-(4-trifluoromethyl)phenylpropanoate (9h):**

Potassium *tert*-butoxide (22.4 mg, 0.2 mmol) was added to a solution of (*E*)-4-trifluoromethylcinnamaldehyde (200 mg, 1 mmol), nitrosobenzene (117 mg, 1.1 mmol) and the catalyst (85 mg, 0.2 mmol) in dichloromethane (2 mL). The reaction mixture was stirred at room temperature for 6 h. The solvent was removed under vacuum, and the residue was diluted with methanol (2 mL), followed by the addition of perchloric acid (3–5 drops). The mixture was stirred at room temperature overnight. The solvent was removed *in vacuo*, and the residue was diluted with CH<sub>2</sub>Cl<sub>2</sub> (5 mL) and saturated aqueous NaHCO<sub>3</sub> (10 mL). The aqueous layer was extracted with CH<sub>2</sub>Cl<sub>2</sub> (10 mL × 2). The combined organic layer was washed with saturated aqueous NaHCO<sub>3</sub> (10 mL) and then brine (10 mL), dried (MgSO<sub>4</sub>), and concentrated. The pure product was obtained through flash silica gel column chromatography of the residue using hexane and ethyl acetate as the eluents.

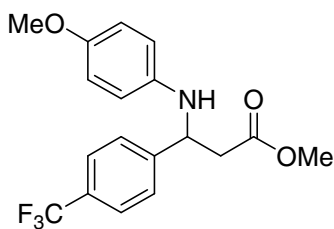

$^1\text{H}$  NMR (400 MHz,  $\text{CDCl}_3$ ):  $\delta$  7.59 (AB,  $J_{AB}$  = 8.4 Hz, 2H, Ar-H), 7.51 (AB,  $J_{AB}$  = 8.4 Hz, 2H, Ar-H), 6.72 (AB, d,  $J_{AB}$  = 8.4 Hz, 2H, Ar-H), 6.51 (AB, d,  $J_{AB}$  = 8.4 Hz, 2H, Ar-H), 4.81 (dd,  $J$  = 3.4, 6.7 Hz, 1H, CH), 4.20 (br s, 1H, NH), 3.71 (s, 3H,  $\text{CH}_3$ ), 3.68 (s, 3H,  $\text{CH}_3$ ), 2.82 (ddd,  $J$  = 1.7, 3.4, 6.7 Hz, 2H,  $\text{CH}_2$ ).  $^{13}\text{C}$  NMR (100 MHz,  $\text{CDCl}_3$ ):  $\delta$  171.3 (Cq, CO), 152.6, 146.6, 140.4 (Cq), 129.7 (q,  $J$  = 32.0 Hz, Cq), 126.7 (C-Ar), 125.8 (q,  $J$  = 3.8 Hz, C-Ar), 125.6 (q,  $J_{CF}$  = 270.4 Hz, Cq,  $\text{CF}_3$ ), 115.2, 114.8 (C-Ar), 55.6, 55.5 ( $\text{OCH}_3$ ), 52.0 (CH), 42.4 ( $\text{CH}_2$ ). MS (ESI):  $m/z$  353 ( $\text{M}^+$ ), 280, 122, 108.

**Methyl 3-(4-methoxyphenylamino)-3-(perfluorophenyl)propanoate (9i):**

Potassium *tert*-butoxide (22.4 mg, 0.2 mmol) was added to a solution of (*E*)-pentafluorocinnamaldehyde (222 mg, 1 mmol), nitrosobenzene (117 mg, 1.1 mmol) and the catalyst (85 mg, 0.2 mmol) in dichloromethane (2 mL). The reaction mixture was stirred at room temperature for 6 h. The solvent was removed under vacuum, and the residue was diluted with methanol (2 mL), followed by the addition of perchloric acid (3–5 drops). The mixture was stirred at room temperature overnight. The solvent was removed *in vacuo*, and the residue was diluted with  $\text{CH}_2\text{Cl}_2$  (5 mL) and saturated aqueous  $\text{NaHCO}_3$  (10 mL). The aqueous layer was extracted with  $\text{CH}_2\text{Cl}_2$  (10 mL  $\times$  2). The combined organic layer was washed with saturated aqueous  $\text{NaHCO}_3$  (10 mL) and then brine (10 mL), dried ( $\text{MgSO}_4$ ), and concentrated. The pure product was obtained through flash silica gel column chromatography of the residue using hexane and ethyl acetate as the eluents.

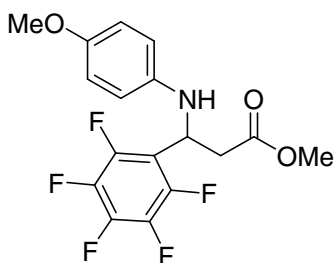

$^1\text{H}$  NMR (400 MHz,  $\text{CDCl}_3$ ):  $\delta$  6.75 (AB, d,  $J_{AB}$  = 9.0 Hz, 2H, Ar-H), 6.64 (AB, d,  $J_{AB}$  = 9.0 Hz, 2H, Ar-H), 5.32 (br t,  $J$  = 7.5 Hz, 1H, CH), 3.96 (br s, 1H, NH), 3.72 (s, 3H,  $\text{OCH}_3$ ), 3.71 (s, 3H,  $\text{OCH}_3$ ), 3.09 (dd,  $J$  = 7.5, 15.3 Hz, 1H,  $\text{CH}_2$ ), 2.93 (dd,  $J$  = 7.5, 15.3 Hz, 1H,  $\text{CH}_2$ ).  $^{13}\text{C}$  NMR (100 MHz,  $\text{CDCl}_3$ ):  $\delta$  170.4 (Cq, CO), 153.4, 146.2 (m), 143.8 (m),

141.7 (m), 138.8 (m), 136.3 (m), 139.4 (Cq), 115.6, 114.9 (C-Ar), 55.5, 52.1 (OCH<sub>3</sub>), 47.3 (CH), 39.7 (CH<sub>2</sub>). MS (ESI): *m/z* 375 (M<sup>+</sup>), 302, 122.

**Methyl 3-(4-methoxyphenylamino)-3-(3,5-difluorophenyl)propanoate (9j):**

Potassium *tert*-butoxide (22.4 mg, 0.2 mmol) was added to a solution of (*E*)-3,5-difluorocinnamaldehyde (168 mg, 1 mmol), nitrosobenzene (117 mg, 1.1 mmol) and the catalyst (85 mg, 0.2 mmol) in dichloromethane (2 mL). The reaction mixture was stirred at room temperature for 6 h. The solvent was removed under vacuum, and the residue was diluted with methanol (2 mL), followed by the addition of perchloric acid (3–5 drops). The mixture was stirred at room temperature overnight. The solvent was removed *in vacuo*, and the residue was diluted with CH<sub>2</sub>Cl<sub>2</sub> (5 mL) and saturated aqueous NaHCO<sub>3</sub> (10 mL). The aqueous layer was extracted with CH<sub>2</sub>Cl<sub>2</sub> (10 mL × 2). The combined organic layer was washed with saturated aqueous NaHCO<sub>3</sub> (10 mL) and then brine (10 mL), dried (MgSO<sub>4</sub>), and concentrated. The pure product was obtained through flash silica gel column chromatography of the residue using hexane and ethyl acetate as the eluents.

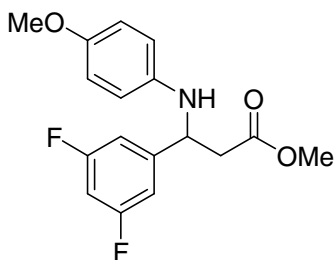

<sup>1</sup>H NMR (400 MHz, CDCl<sub>3</sub>): δ 6.93 (dd, *J* = 2.2, 8.0 Hz, 2H, Ar-H), 6.73 (AB, d, *J*<sub>AB</sub> = 8.8 Hz, 2H, Ar-H), 6.70–6.66 (m, 1H, Ar-H), 6.51 (AB, d, *J*<sub>AB</sub> = 8.8 Hz, 2H, Ar-H), 4.72 (dd, *J* = 5.6, 7.6 Hz, 1H, CH), 4.34 (br s, 1H, NH), 3.73 (s, 3H, OCH<sub>3</sub>), 3.70 (s, 3H, OCH<sub>3</sub>), 2.78 (ddd, *J* = 5.6, 5.8, 7.6 Hz, 2H, CH<sub>2</sub>). <sup>13</sup>C NMR (100 MHz, CDCl<sub>3</sub>): δ 171.0 (Cq, CO), 152.8, 146.0, 144.7, 140.0 (Cq), 132.2, 127.0, 123.1, 115.2, 114.9 (CH), 55.7, 54.8 (OCH<sub>3</sub>), 52.1 (CH), 42.3 (CH<sub>2</sub>). MS (ESI): *m/z* 321 (M<sup>+</sup>), 248, 122.

**1-Ethyl 4-methyl 2-(4-methoxyphenylamino)succinate (9k):** Potassium *tert*-butoxide (22.4 mg, 0.2 mmol) was added to a solution of (*E*)-ethyl 3-formylacrylate (128 mg, 1 mmol), nitrosobenzene (117 mg, 1.1 mmol) and the catalyst (85 mg, 0.2 mmol) in dichloromethane (2 mL). The reaction mixture was stirred at room temperature for 6 h. The solvent was removed under vacuum, and the residue was diluted with methanol (2 mL),

followed by the addition of perchloric acid (3–5 drops). The mixture was stirred at room temperature overnight. The solvent was removed *in vacuo*, and the residue was diluted with CH<sub>2</sub>Cl<sub>2</sub> (5 mL) and saturated aqueous NaHCO<sub>3</sub> (10 mL). The aqueous layer was extracted with CH<sub>2</sub>Cl<sub>2</sub> (10 mL × 2). The combined organic layer was washed with saturated aqueous NaHCO<sub>3</sub> (10 mL) and then brine (10 mL), dried (MgSO<sub>4</sub>), and concentrated. The pure product was obtained through flash silica gel column chromatography of the residue using hexane and ethyl acetate as the eluents.

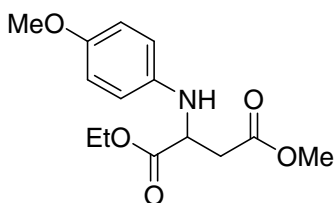

<sup>1</sup>H NMR (400 MHz, CDCl<sub>3</sub>):  $\delta$  6.78 (AB, d,  $J_{AB}$  = 8.9 Hz, 2H, Ar-H), 6.67 (AB, d,  $J_{AB}$  = 8.9 Hz, 2H, Ar-H), 4.36 (t,  $J$  = 6.0 Hz, 1H, CH), 4.20 (dq,  $J$  = 2.5, 7.1 Hz, 2H, CH<sub>2</sub>), 3.75 (s, 3H, CH<sub>3</sub>), 3.71 (s, 3H, CH<sub>3</sub>), 2.85 (d,  $J$  = 6.0 Hz, 2H, CH<sub>2</sub>), 2.00 (br s, 1H, NH), 1.85 (t,  $J$  = 7.1 Hz, 3H, CH<sub>3</sub>). <sup>13</sup>C NMR (100 MHz, CDCl<sub>3</sub>):  $\delta$  172.5, 171.1 (Cq, CO), 153.2, 140.1 (Cq), 115.9, 114.8 (C-Ar), 61.6 (OCH<sub>2</sub>), 55.7, 54.9 (OCH<sub>3</sub>), 52.0 (CH), 37.4 (CH<sub>2</sub>), 14.1 (CH<sub>3</sub>). MS (ESI):  $m/z$  281 (M<sup>+</sup>), 208, 148, 134.

**Methyl 3-(4-methoxyphenylamino)heptanoate (9I):** Potassium *tert*-butoxide (22.4 mg, 0.2 mmol) was added to a solution of (*E*)-hept-2-enal (112 mg, 1 mmol), nitrosobenzene (117 mg, 1.1 mmol) and the catalyst (85 mg, 0.2 mmol) in dichloromethane (2 mL). The reaction mixture was stirred at room temperature for 6 h. The solvent was removed under vacuum and the residue was diluted with methanol (2 mL), followed by the addition of perchloric acid (3–5 drops). The mixture was stirred at room temperature overnight. The solvent was removed *in vacuo*, and the residue was diluted with CH<sub>2</sub>Cl<sub>2</sub> (5 mL) and saturated aqueous NaHCO<sub>3</sub> (10 mL). The aqueous layer was extracted with CH<sub>2</sub>Cl<sub>2</sub> (10 mL × 2). The combined organic layer was washed with saturated aqueous NaHCO<sub>3</sub> (10 mL) and then brine (10 mL), dried (MgSO<sub>4</sub>), and concentrated. The pure product was obtained through flash silica gel column chromatography of the residue using hexane and ethyl acetate as the eluents.

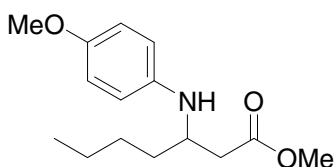

$^1\text{H}$  NMR (400 MHz,  $\text{CDCl}_3$ ):  $\delta$  6.78 (AB, d,  $J_{AB} = 9.0$  Hz, 2H, Ar-H), 6.61 (AB, d,  $J_{AB} = 9.0$  Hz, 2H, Ar-H), 3.71 (pentet,  $J = 6.1$  Hz, 1H, CH), 3.75 (s, 3H,  $\text{OCH}_3$ ), 3.67 (s, 3H,  $\text{OCH}_3$ ), 3.49 (br s, 1H, NH), 2.52 (ddd,  $J = 5.6, 6.1, 15.1$  Hz, 2H,  $\text{CH}_2$ ), 1.60–1.53 (m, 2H,  $\text{CH}_2$ ), 1.47–1.30 (m, 4H,  $\text{CH}_2$ ), 0.90 (br t,  $J = 6.9$  Hz, 3H,  $\text{CH}_3$ ).  $^{13}\text{C}$  NMR (100 MHz,  $\text{CDCl}_3$ ):  $\delta$  172.6, 152.2, 141.3 (Cq), 115.1, 114.9 (C-Ar), 55.8, 51.6, 51.5 (CH,  $\text{OCH}_3$ ), 39.0, 34.7, 28.3, 22.6 ( $\text{CH}_2$ ), 14.0 ( $\text{CH}_3$ ). MS (ESI):  $m/z$  265 ( $\text{M}^+$ ), 208, 192, 148, 134.

**4-(2-Methoxycarbonyl)-1-(4-methoxyphenylamino)ethyl-2-methoxyphenyl trifluoromethane sulfonate (12):** Potassium *tert*-butoxide (22.4 mg, 0.2 mmol) was added to a solution of (*E*)-3-methoxy-4-trifluoromethylsulfonyloxycinnamaldehyde (310 mg, 1 mmol), nitrosobenzene (117 mg, 1.1 mmol) and the catalyst (85 mg, 0.2 mmol) in dichloromethane (2 mL). The reaction mixture was stirred at room temperature for 6 h. The solvent was removed under vacuum, and the residue was diluted with methanol (2 mL), followed by the addition of perchloric acid (3–5 drops). The mixture was stirred at room temperature overnight. The solvent was removed *in vacuo*, and the residue was diluted with  $\text{CH}_2\text{Cl}_2$  (5 mL) and saturated aqueous  $\text{NaHCO}_3$  (10 mL). The aqueous layer was extracted with  $\text{CH}_2\text{Cl}_2$  (10 mL  $\times$  2). The combined organic layer was washed with saturated aqueous  $\text{NaHCO}_3$  (10 mL) and then brine (10 mL), dried ( $\text{MgSO}_4$ ), and concentrated. The pure product was obtained through flash silica gel column chromatography of the residue using hexane and ethyl acetate as the eluents.

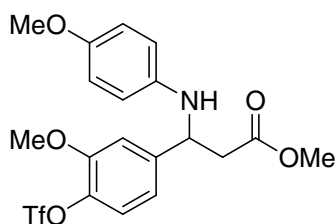

$^1\text{H}$  NMR (400 MHz,  $\text{CDCl}_3$ ):  $\delta$  7.18 (d,  $J = 8.4$  Hz, 1H, Ar-H), 7.09 (d,  $J = 2.0$  Hz, 1H, Ar-H), 6.99 (dd,  $J = 2.0, 8.4$  Hz, 1H, Ar-H), 6.73 (AB, d,  $J_{AB} = 8.8$  Hz, 2H, Ar-H), 6.51 (AB, d,  $J_{AB} = 8.8$  Hz, 2H, Ar-H), 4.73 (dd,  $J = 5.8, 7.6$  Hz, 1H, CH), 4.32 (br s, 1H, NH), 3.89 (s, 3H,  $\text{CH}_3$ ), 3.72 (s, 3H,  $\text{CH}_3$ ), 3.68 (s, 3H,  $\text{CH}_3$ ), 2.79 (ddd,  $J = 5.6, 5.8, 7.6$  Hz, 2H,  $\text{CH}_2$ ).  $^{13}\text{C}$  NMR (100 MHz,  $\text{CDCl}_3$ ):  $\delta$  171.4 (Cq, CO), 152.6, 151.6, 144.4, 140.5, 137.7, 117.3 (q,  $J_{CF} = 270.4$  Hz, Cq,  $\text{CF}_3$ ), 122.6, 117.1, 115.2, 114.8, 111.0, 56.2, 55.6 ( $\text{OCH}_3$ ), 52.0 (CH), 42.5 ( $\text{CH}_2$ ). MS (ESI):  $m/z$  463 ( $\text{M}^+$ ), 390, 299, 256, 122.

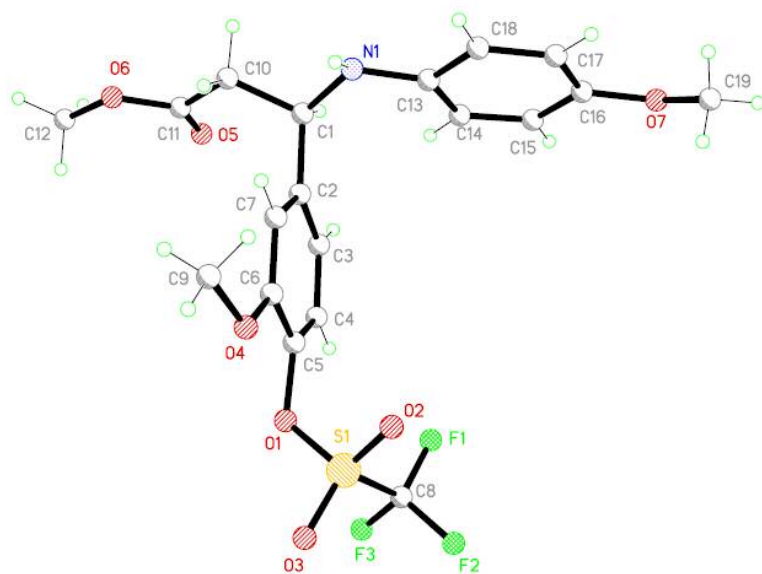

X-Ray Crystal Structure of **12**.

**Table 1.** Crystal data and structure refinement for **12**.

|                                   |                                                                   |                 |
|-----------------------------------|-------------------------------------------------------------------|-----------------|
| Empirical formula                 | C <sub>19</sub> H <sub>20</sub> F <sub>3</sub> N O <sub>7</sub> S |                 |
| Formula weight                    | 463.42                                                            |                 |
| Temperature                       | 295(2) K                                                          |                 |
| Wavelength                        | 0.71073 Å                                                         |                 |
| Crystal system                    | Triclinic                                                         |                 |
| Space group                       | P-1                                                               |                 |
| Unit cell dimensions              | a = 6.0822(10) Å                                                  | α = 69.877(3)°. |
|                                   | b = 11.4054(18) Å                                                 | β = 85.336(3)°. |
|                                   | c = 16.008(3) Å                                                   | γ = 89.285(3)°. |
| Volume                            | 1039.1(3) Å <sup>3</sup>                                          |                 |
| Z                                 | 2                                                                 |                 |
| Density (calculated)              | 1.481 Mg/m <sup>3</sup>                                           |                 |
| Absorption coefficient            | 0.224 mm <sup>-1</sup>                                            |                 |
| F(000)                            | 480                                                               |                 |
| Crystal size                      | 0.50 × 0.44 × 0.10 mm <sup>3</sup>                                |                 |
| Theta range for data collection   | 1.36 to 26.00°                                                    |                 |
| Index ranges                      | -7 ≤ h ≤ 7, -14 ≤ k ≤ 14, -19 ≤ l ≤ 19                            |                 |
| Reflections collected             | 11953                                                             |                 |
| Independent reflections           | 4080 [R(int) = 0.0278]                                            |                 |
| Completeness to theta = 26.00°    | 100.0 %                                                           |                 |
| Absorption correction             | Sadabs, (Sheldrick 2001)                                          |                 |
| Max. and min. transmission        | 0.9779 and 0.8962                                                 |                 |
| Refinement method                 | Full-matrix least-squares on F <sup>2</sup>                       |                 |
| Data / restraints / parameters    | 4080 / 0 / 287                                                    |                 |
| Goodness-of-fit on F <sup>2</sup> | 1.032                                                             |                 |
| Final R indices [I > 2σ(I)]       | R1 = 0.0647, wR2 = 0.1704                                         |                 |
| R indices (all data)              | R1 = 0.0918, wR2 = 0.1883                                         |                 |
| Largest diff. peak and hole       | 0.646 and -0.187 e.Å <sup>-3</sup>                                |                 |

**Table 2.** Atomic coordinates ( $\times 10^4$ ) and equivalent isotropic displacement parameters ( $\text{\AA}^2 \times 10^3$ ) for **12**. U(eq) is defined as one third of the trace of the orthogonalized  $U^{ij}$  tensor.

|       | x        | y        | z        | U(eq)  |
|-------|----------|----------|----------|--------|
| S(1)  | 6343(1)  | -2241(1) | 4372(1)  | 69(1)  |
| O(1)  | 4756(4)  | -1131(2) | 4282(1)  | 69(1)  |
| O(2)  | 8255(4)  | -1891(2) | 3784(2)  | 83(1)  |
| O(3)  | 6413(5)  | -2889(2) | 5287(2)  | 104(1) |
| O(4)  | 7902(4)  | 573(2)   | 4105(1)  | 71(1)  |
| O(5)  | 796(3)   | 4067(2)  | 1909(2)  | 76(1)  |
| O(6)  | 2297(4)  | 5203(2)  | 2592(2)  | 85(1)  |
| O(7)  | 9341(5)  | 922(4)   | -1499(2) | 130(1) |
| N(1)  | 7089(4)  | 3664(2)  | 752(2)   | 66(1)  |
| F(1)  | 4324(5)  | -2618(2) | 3124(2)  | 124(1) |
| F(2)  | 5695(4)  | -4238(2) | 4016(2)  | 112(1) |
| F(3)  | 2779(4)  | -3495(2) | 4431(2)  | 121(1) |
| C(1)  | 5051(4)  | 3428(3)  | 1322(2)  | 59(1)  |
| C(2)  | 4988(4)  | 2193(2)  | 2103(2)  | 51(1)  |
| C(3)  | 3413(5)  | 1287(3)  | 2198(2)  | 67(1)  |
| C(4)  | 3374(5)  | 171(3)   | 2907(2)  | 68(1)  |
| C(5)  | 4900(5)  | -27(2)   | 3515(2)  | 57(1)  |
| C(6)  | 6509(4)  | 867(2)   | 3451(2)  | 53(1)  |
| C(7)  | 6528(4)  | 1973(2)  | 2732(2)  | 51(1)  |
| C(8)  | 4672(7)  | -3202(3) | 3953(3)  | 85(1)  |
| C(9)  | 9344(6)  | 1524(3)  | 4132(2)  | 79(1)  |
| C(10) | 4662(5)  | 4532(3)  | 1642(2)  | 62(1)  |
| C(11) | 2384(5)  | 4553(2)  | 2060(2)  | 59(1)  |
| C(12) | 151(7)   | 5344(5)  | 3008(4)  | 109(2) |
| C(13) | 7659(5)  | 2935(3)  | 223(2)   | 62(1)  |
| C(14) | 6166(5)  | 2215(3)  | -4(2)    | 73(1)  |
| C(15) | 6766(6)  | 1579(4)  | -578(3)  | 83(1)  |
| C(16) | 8887(7)  | 1613(4)  | -928(3)  | 90(1)  |
| C(17) | 10381(6) | 2303(5)  | -709(3)  | 97(1)  |
| C(18) | 9807(5)  | 2979(4)  | -149(2)  | 83(1)  |
| C(19) | 11368(8) | 536(5)   | -1594(3) | 109(1) |

**Table 3.** Bond lengths [Å] and angles [°] for **12**.

---

|                |            |
|----------------|------------|
| S(1)-O(3)      | 1.398(3)   |
| S(1)-O(2)      | 1.405(2)   |
| S(1)-O(1)      | 1.556(2)   |
| S(1)-C(8)      | 1.825(4)   |
| O(1)-C(5)      | 1.423(3)   |
| O(4)-C(6)      | 1.349(3)   |
| O(4)-C(9)      | 1.417(4)   |
| O(5)-C(11)     | 1.201(3)   |
| O(6)-C(11)     | 1.306(4)   |
| O(6)-C(12)     | 1.449(4)   |
| O(7)-C(19)     | 1.319(5)   |
| O(7)-C(16)     | 1.408(5)   |
| N(1)-C(13)     | 1.398(4)   |
| N(1)-C(1)      | 1.449(4)   |
| F(1)-C(8)      | 1.297(4)   |
| F(2)-C(8)      | 1.305(4)   |
| F(3)-C(8)      | 1.309(5)   |
| C(1)-C(10)     | 1.523(4)   |
| C(1)-C(2)      | 1.526(4)   |
| C(2)-C(3)      | 1.379(4)   |
| C(2)-C(7)      | 1.388(4)   |
| C(3)-C(4)      | 1.383(4)   |
| C(4)-C(5)      | 1.359(4)   |
| C(5)-C(6)      | 1.395(4)   |
| C(6)-C(7)      | 1.385(4)   |
| C(10)-C(11)    | 1.492(4)   |
| C(13)-C(14)    | 1.382(5)   |
| C(13)-C(18)    | 1.385(4)   |
| C(14)-C(15)    | 1.379(5)   |
| C(15)-C(16)    | 1.359(5)   |
| C(16)-C(17)    | 1.353(6)   |
| C(17)-C(18)    | 1.392(5)   |
| O(3)-S(1)-O(2) | 122.61(18) |
| O(3)-S(1)-O(1) | 106.54(16) |
| O(2)-S(1)-O(1) | 112.50(13) |
| O(3)-S(1)-C(8) | 106.22(18) |

|                   |            |
|-------------------|------------|
| O(2)-S(1)-C(8)    | 106.56(19) |
| O(1)-S(1)-C(8)    | 99.86(16)  |
| C(5)-O(1)-S(1)    | 121.93(18) |
| C(6)-O(4)-C(9)    | 117.9(2)   |
| C(11)-O(6)-C(12)  | 117.3(3)   |
| C(19)-O(7)-C(16)  | 118.9(3)   |
| C(13)-N(1)-C(1)   | 120.9(3)   |
| N(1)-C(1)-C(10)   | 108.0(2)   |
| N(1)-C(1)-C(2)    | 114.1(2)   |
| C(10)-C(1)-C(2)   | 111.6(3)   |
| C(3)-C(2)-C(7)    | 119.1(2)   |
| C(3)-C(2)-C(1)    | 121.0(3)   |
| C(7)-C(2)-C(1)    | 119.9(2)   |
| C(2)-C(3)-C(4)    | 120.5(3)   |
| C(5)-C(4)-C(3)    | 119.4(3)   |
| C(4)-C(5)-C(6)    | 122.1(3)   |
| C(4)-C(5)-O(1)    | 119.5(3)   |
| C(6)-C(5)-O(1)    | 118.2(3)   |
| O(4)-C(6)-C(7)    | 126.0(2)   |
| O(4)-C(6)-C(5)    | 116.6(2)   |
| C(7)-C(6)-C(5)    | 117.4(3)   |
| C(6)-C(7)-C(2)    | 121.4(2)   |
| F(1)-C(8)-F(2)    | 109.0(4)   |
| F(1)-C(8)-F(3)    | 109.4(4)   |
| F(2)-C(8)-F(3)    | 107.9(3)   |
| F(1)-C(8)-S(1)    | 110.7(3)   |
| F(2)-C(8)-S(1)    | 109.5(3)   |
| F(3)-C(8)-S(1)    | 110.3(3)   |
| C(11)-C(10)-C(1)  | 113.4(2)   |
| O(5)-C(11)-O(6)   | 123.4(3)   |
| O(5)-C(11)-C(10)  | 124.6(3)   |
| O(6)-C(11)-C(10)  | 111.9(2)   |
| C(14)-C(13)-C(18) | 116.6(3)   |
| C(14)-C(13)-N(1)  | 123.9(3)   |
| C(18)-C(13)-N(1)  | 119.4(3)   |
| C(15)-C(14)-C(13) | 122.0(3)   |
| C(16)-C(15)-C(14) | 120.9(4)   |
| C(17)-C(16)-C(15) | 118.1(4)   |

|                   |          |
|-------------------|----------|
| C(17)-C(16)-O(7)  | 125.3(4) |
| C(15)-C(16)-O(7)  | 116.6(4) |
| C(16)-C(17)-C(18) | 122.1(4) |
| C(13)-C(18)-C(17) | 120.2(4) |

---

Symmetry transformations used to generate equivalent atoms:

'x, y, z' '-x, -y, -z'

**Table 4.** Anisotropic displacement parameters ( $\text{\AA}^2 \times 10^3$ ) for **12**. The anisotropic displacement factor exponent takes the form:  $-2\pi^2[h^2 a^{*2}U^{11} + \dots + 2hka^*b^*U^{12}]$ .

|       | $U^{11}$ | $U^{22}$ | $U^{33}$ | $U^{23}$ | $U^{13}$ | $U^{12}$ |
|-------|----------|----------|----------|----------|----------|----------|
| S(1)  | 79(1)    | 46(1)    | 73(1)    | -6(1)    | -15(1)   | -4(1)    |
| O(1)  | 80(1)    | 44(1)    | 67(1)    | -4(1)    | 13(1)    | -8(1)    |
| O(2)  | 66(1)    | 67(1)    | 106(2)   | -19(1)   | -1(1)    | -1(1)    |
| O(3)  | 141(2)   | 71(2)    | 81(2)    | 5(1)     | -33(2)   | -7(2)    |
| O(4)  | 96(2)    | 52(1)    | 62(1)    | -9(1)    | -23(1)   | -9(1)    |
| O(5)  | 56(1)    | 74(2)    | 103(2)   | -37(1)   | -12(1)   | -12(1)   |
| O(6)  | 69(2)    | 90(2)    | 112(2)   | -55(2)   | -14(1)   | -6(1)    |
| O(7)  | 93(2)    | 211(4)   | 130(3)   | -112(3)  | -24(2)   | 31(2)    |
| N(1)  | 51(1)    | 65(2)    | 70(2)    | -7(1)    | -10(1)   | -12(1)   |
| F(1)  | 176(3)   | 83(2)    | 116(2)   | -28(2)   | -62(2)   | -14(2)   |
| F(2)  | 134(2)   | 58(1)    | 148(2)   | -38(1)   | -11(2)   | 0(1)     |
| F(3)  | 88(2)    | 97(2)    | 174(3)   | -45(2)   | -1(2)    | -27(1)   |
| C(1)  | 50(2)    | 48(2)    | 70(2)    | -8(1)    | -11(1)   | -4(1)    |
| C(2)  | 43(1)    | 45(1)    | 61(2)    | -11(1)   | -3(1)    | -1(1)    |
| C(3)  | 55(2)    | 54(2)    | 84(2)    | -10(2)   | -18(2)   | -8(1)    |
| C(4)  | 55(2)    | 44(2)    | 93(2)    | -10(2)   | -6(2)    | -11(1)   |
| C(5)  | 63(2)    | 38(1)    | 60(2)    | -7(1)    | 7(1)     | -4(1)    |
| C(6)  | 58(2)    | 46(2)    | 53(2)    | -16(1)   | -4(1)    | 0(1)     |
| C(7)  | 52(2)    | 43(1)    | 57(2)    | -15(1)   | 2(1)     | -10(1)   |
| C(8)  | 97(3)    | 52(2)    | 101(3)   | -16(2)   | -20(2)   | -8(2)    |
| C(9)  | 98(3)    | 68(2)    | 68(2)    | -16(2)   | -27(2)   | -10(2)   |
| C(10) | 51(2)    | 44(2)    | 83(2)    | -9(1)    | -16(1)   | -7(1)    |
| C(11) | 59(2)    | 39(1)    | 74(2)    | -11(1)   | -20(1)   | -3(1)    |
| C(12) | 97(3)    | 114(3)   | 138(4)   | -73(3)   | 9(3)     | -9(3)    |
| C(13) | 62(2)    | 60(2)    | 52(2)    | -4(1)    | -10(1)   | 3(1)     |
| C(14) | 53(2)    | 78(2)    | 77(2)    | -14(2)   | -3(2)    | -2(2)    |
| C(15) | 73(2)    | 91(3)    | 86(2)    | -29(2)   | -16(2)   | 2(2)     |
| C(16) | 79(2)    | 115(3)   | 81(2)    | -38(2)   | -23(2)   | 15(2)    |
| C(17) | 66(2)    | 150(4)   | 76(2)    | -40(3)   | -3(2)    | 16(2)    |
| C(18) | 57(2)    | 107(3)   | 80(2)    | -21(2)   | -16(2)   | -7(2)    |
| C(19) | 121(4)   | 121(4)   | 88(3)    | -38(3)   | -15(3)   | 24(3)    |

**Table 5.** Hydrogen coordinates ( $\times 10^4$ ) and isotropic displacement parameters ( $\text{\AA}^2 \times 10^3$ ) for **12**.

|        | x        | y        | z        | U(eq)  |
|--------|----------|----------|----------|--------|
| H(1)   | 3849     | 3404     | 956      | 71     |
| H(3)   | 2369     | 1428     | 1782     | 80     |
| H(4)   | 2313     | -439     | 2968     | 81     |
| H(7)   | 7594     | 2582     | 2669     | 62     |
| H(9A)  | 10323    | 1791     | 3597     | 118    |
| H(9B)  | 10189    | 1205     | 4641     | 118    |
| H(9C)  | 8497     | 2219     | 4174     | 118    |
| H(10A) | 5713     | 4504     | 2073     | 74     |
| H(10B) | 4935     | 5300     | 1138     | 74     |
| H(12A) | -915     | 5539     | 2572     | 164    |
| H(12B) | 221      | 6006     | 3247     | 164    |
| H(12C) | -275     | 4578     | 3481     | 164    |
| H(14)  | 4711     | 2159     | 237      | 87     |
| H(15)  | 5707     | 1121     | -728     | 100    |
| H(17)  | 11840    | 2328     | -940     | 116    |
| H(18)  | 10868    | 3462     | -24      | 100    |
| H(19A) | 12369    | 1240     | -1796    | 164    |
| H(19B) | 11443    | 119      | -2023    | 164    |
| H(19C) | 11768    | -32      | -1030    | 164    |
| H(1N)  | 8200(60) | 3820(30) | 1030(20) | 85(11) |

**Table 6.** Hydrogen bonds for **12** [ $\text{\AA}$  and  $^\circ$ ].

| D-H...A             | d(D-H)  | d(H...A) | d(D...A) | $\angle$ (DHA) |
|---------------------|---------|----------|----------|----------------|
| N(1)-H(1N)...O(5)#1 | 0.89(4) | 2.28(4)  | 3.166(4) | 173(3)         |

Symmetry transformations used to generate equivalent atoms:

#1 x+1,y,z

**Procedure for the  $^1\text{H}$  NMR experiments:** The base (0.10 mmol) was added under argon to a solution of  $\alpha,\beta$ -unsaturated aldehyde (0.10 mmol), nitrosobenzene (0.11 mmol) and the catalyst (0.02 mmol) in the corresponding deuterated solvent (1 mL). The reaction mixture was stirred at room temperature for 1–3 h. The  $^1\text{H}$  NMR spectra were recorded directly.

**2,3-Diphenylisoxazolidin-5-one (3a):**

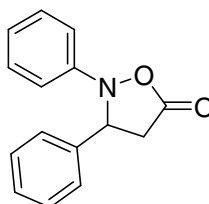

$^1\text{H}$  NMR (400 MHz,  $\text{CDCl}_3$ ):  $\delta$  7.40–7.00 (m, 10H, Ar-H), 4.77 (dd,  $J = 7.6, 9.6$  Hz, 1H, CH), 3.13 (ddd,  $J = 7.6, 17.3$  Hz, 1H,  $\text{CH}_2$ ), 2.94 (dd,  $J = 9.6, 17.3$  Hz, 1H,  $\text{CH}_2$ ). MS (ESI):  $m/z$  239 ( $\text{M}^+$ ), 196, 131, 120, 104.

**3-(4-Nitrophenyl)-2-phenylisoxazolidin-5-one (3b):**

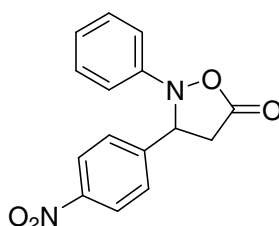

$^1\text{H}$  NMR (400 MHz,  $\text{CDCl}_3$ ):  $\delta$  8.24 (AB, d,  $J_{AB} = 8.8$  Hz, 2H, Ar-H), 7.62 (AB, d,  $J_{AB} = 8.8$  Hz, 2H, Ar-H), 7.19–7.05 (m, 4H, Ar-H), 6.98–6.95 (m, 1H, Ar-H), 5.14 (dt,  $J = 2.5, 6.0$  Hz, 1H, CH), 3.12 (dd,  $J = 6.0, 12.9$  Hz, 1H,  $\text{CH}_2$ ), 2.81 (dd,  $J = 6.0, 12.9$  Hz, 1H,  $\text{CH}_2$ ).  $^{13}\text{C}$  NMR (100 MHz,  $\text{CDCl}_3$ ):  $\delta$  167.8 (Cq, CO), 149.3, 144.9, 135.2 (Cq), 126.6, 124.3, 124.2, 122.8, 120.7 (C-Ar), 62.5 (CH), 38.8 ( $\text{CH}_2$ ). MS (ESI):  $m/z$  240, 225, 179, 118, 77.

**Degradation of Methyl 3-(4-methoxyphenylamino)-3-(4-nitrophenyl)propanoate (3b):** The isoxazolidinone **3b** obtained by the reaction of 4-nitro cinnamaldehyde with nitrosobenzene over NHC was subjected to chromatographic purification. Upon silica gel column chromatography using hexane and ethyl acetate as the eluents, the products imine **DP-1** and **DP-2** obtained were characterized by NMR and mass spectroscopy.

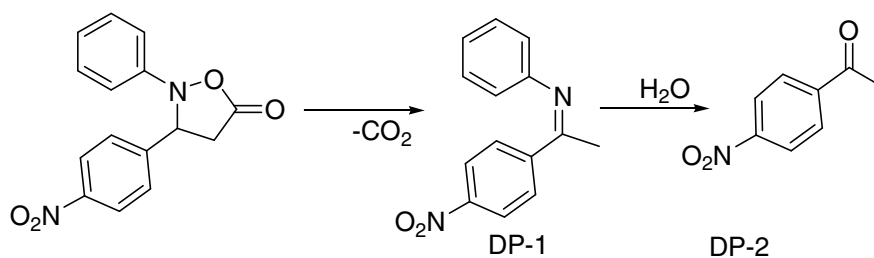

**3-(2-Nitrophenyl)-2-phenylisoxazolidin-5-one (3c):**

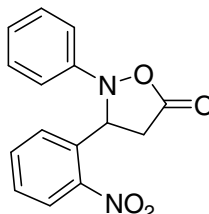

$^1\text{H}$  NMR (400 MHz,  $\text{CDCl}_3$ ):  $\delta$  8.00–6.90 (m, 9H, Ar-H), 5.54 (dd,  $J = 5.8, 8.7$  Hz, 1H, CH), 3.49 (dd,  $J = 8.7, 17.9$  Hz, 1H,  $\text{CH}_2$ ), 2.68 (dd,  $J = 5.8, 17.9$  Hz, 1H,  $\text{CH}_2$ ).  $m/z$  284 ( $\text{M}^+$ ), 266, 249, 224, 176, 130, 120, 108, 91, 79.

**2-Methoxy-4-(5-oxo-2-phenylisoxazolidin-3-yl)phenyl trifluoromethanesulfonate**

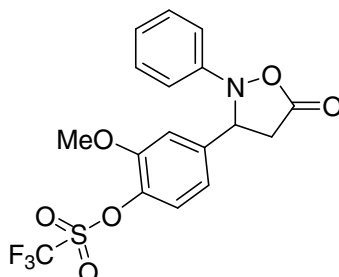

$^1\text{H}$  NMR (400 MHz,  $\text{CDCl}_3$ ):  $\delta$  7.70–7.00 (m, 8H, Ar-H), 4.84 (dd,  $J = 8.0, 8.9$  Hz, 1H, CH), 3.84 (s, 3H,  $\text{OCH}_3$ ), 3.20 (dd,  $J = 8.0, 17.3$  Hz, 1H,  $\text{CH}_2$ ), 2.92 (dd,  $J = 8.9, 17.3$  Hz, 1H,  $\text{CH}_2$ ).  $m/z$  373, 358, 240, 225, 118.

**2-Bromo-4-(5-oxo-2-phenylisoxazolidin-3-yl)phenyl trifluoromethanesulfonate (3d)**

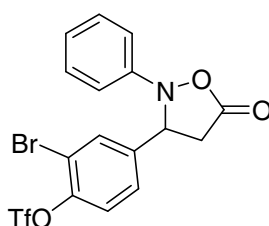

$^1\text{H}$  NMR (400 MHz,  $\text{CDCl}_3$ ):  $\delta$  7.80–7.07 (m, 8H, Ar-H), 5.15 (dd,  $J = 7.5, 8.1$  Hz, 1H, CH), 3.32 (dd,  $J = 8.1, 17.3$  Hz, 1H,  $\text{CH}_2$ ), 3.04 (dd,  $J = 7.5, 17.3$  Hz, 1H,  $\text{CH}_2$ ). MS (ESI):  $m/z$  423, 409, 273, 209, 181, 118, 77.

**Methyl 4-(5-oxo-2-phenylisoxazolidin-3-yl)benzoate (3e):**

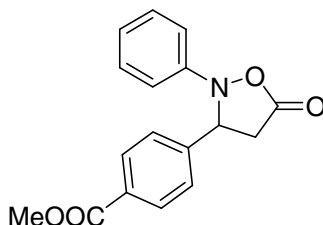

$^1\text{H}$  NMR (400 MHz,  $\text{CDCl}_3$ ):  $\delta$  8.00–6.93 (m, 9H, Ar-H), 4.84 (dd,  $J = 7.9, 9.3$  Hz, 1H, CH), 3.78 (s, 3H,  $\text{OCH}_3$ ), 3.16 (dd,  $J = 7.9, 17.3$  Hz, 1H,  $\text{CH}_2$ ), 2.91 (dd,  $J = 9.3, 17.3$  Hz, 1H,  $\text{CH}_2$ ). MS (ESI):  $m/z$  253, 238, 118, 77.

**Methyl 6-(5-oxo-2-phenylisoxazolidin-3-yl)naphthalene-2-carboxylate (3f):**

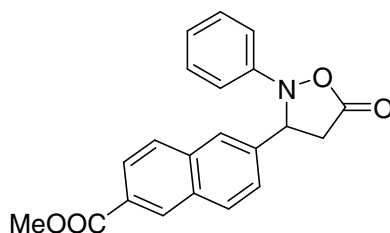

$^1\text{H}$  NMR (400 MHz,  $\text{CDCl}_3$ ):  $\delta$  8.60 (s, 1H, Ar-H), 8.10–7.32 (m, 5H, Ar-H), 7.29–7.22 (m, 3H, Ar-H), 7.10–7.04 (m, 2H, Ar-H), 5.18 (dd,  $J = 7.9, 9.0$  Hz, 1H, CH), 3.91 (s, 3H,  $\text{OCH}_3$ ), 3.33 (dd,  $J = 7.9, 17.2$  Hz, 1H,  $\text{CH}_2$ ), 3.13 (dd,  $J = 9.0, 17.2$  Hz, 1H,  $\text{CH}_2$ ).

**4-(5-oxo-2-phenylisoxazolidin-3-yl)benzonitrile (3g):**

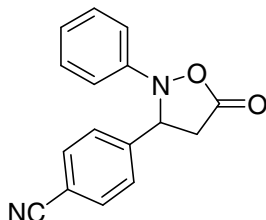

$^1\text{H}$  NMR (400 MHz,  $\text{CDCl}_3$ ):  $\delta$  7.74–6.87 (m, 9H, Ar-H), 4.86 (br t,  $J = 8.2$  Hz, 1H, CH), 3.20 (dd,  $J = 8.2, 17.3$  Hz, 1H,  $\text{CH}_2$ ), 2.87 (dd,  $J = 8.2, 17.3$  Hz, 1H,  $\text{CH}_2$ ). MS (ESI):  $m/z$  220, 205, 118, 77.

**3-(4-(Trifluoromethyl)phenyl)-2-phenylisoxazolidin-5-one (3h):**

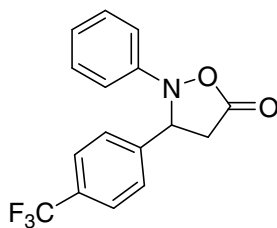

$^1\text{H}$  NMR (400 MHz,  $\text{CDCl}_3$ ):  $\delta$  7.59–7.00 (m, 9H, Ar-H), 4.87 (dd,  $J$  = 8.1, 9.0 Hz, 1H, CH), 3.19 (dd,  $J$  = 8.1, 17.3 Hz, 1H,  $\text{CH}_2$ ), 2.90 (dd,  $J$  = 9.0, 17.3 Hz, 1H,  $\text{CH}_2$ ). MS (ESI):  $m/z$  307 ( $\text{M}^+$ ), 264, 199, 120, 109.

**3-(Perfluorophenyl)-2-phenylisoxazolidin-5-one (3i):**

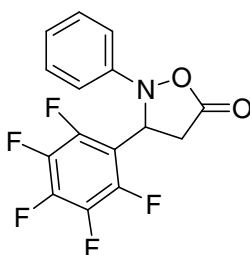

$^1\text{H}$  NMR (400 MHz,  $\text{CDCl}_3$ ):  $\delta$  7.50–7.20 (m, 5H, Ar-H), 5.25 (dd,  $J$  = 6.7, 9.0 Hz, 1H, CH), 3.23 (dd,  $J$  = 9.0, 17.5 Hz, 1H,  $\text{CH}_2$ ), 3.11 (dd,  $J$  = 6.7, 17.5 Hz, 1H,  $\text{CH}_2$ ). MS (ESI):  $m/z$  329 ( $\text{M}^+$ ), 287, 221, 120.

**3-(3,5-Difluorophenyl)-2-phenylisoxazolidin-5-one (3j):**

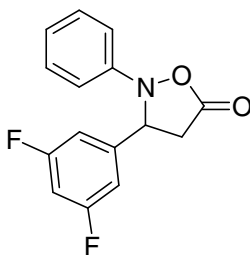

$^1\text{H}$  NMR (400 MHz,  $\text{CDCl}_3$ ):  $\delta$  7.57–6.81 (m, 8H, Ar-H), 5.07 (t,  $J$  = 8.0 Hz, 1H, CH), 3.29 (dd,  $J$  = 8.0, 17.2 Hz, 1H,  $\text{CH}_2$ ), 3.01 (dd,  $J$  = 8.0, 17.2 Hz, 1H,  $\text{CH}_2$ ). MS (ESI):  $m/z$  275 ( $\text{M}^+$ ), 232, 167, 120, 109.

**Ethyl 5-oxo-2-phenylisoxazolidine-3-carboxylate (3k):**

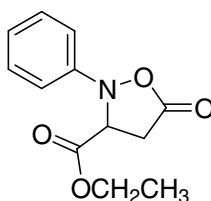

$^1\text{H}$  NMR (400 MHz,  $\text{CDCl}_3$ ):  $\delta$  7.50–7.00 (m, 5H, Ar-H), 4.62 (dd,  $J$  = 4.9, 7.5 Hz, 1H, CH), 4.26 (q,  $J$  = 7.0 Hz, 2H,  $\text{OCH}_2$ ), 3.11 (ddd,  $J$  = 4.9, 7.5, 17.2 Hz, 2H,  $\text{CH}_2$ ), 1.29 (t,  $J$  = 7.0 Hz, 3H,  $\text{CH}_3$ ). MS (ESI):  $m/z$  235 ( $\text{M}^+$ ), 207, 162, 134, 120, 99.

**Proposed mechanism for the acid-catalyzed conversion of *N*-phenylisoxazolidi-5-ones to *N*-PMP protected  $\beta$ -amino acid esters:**

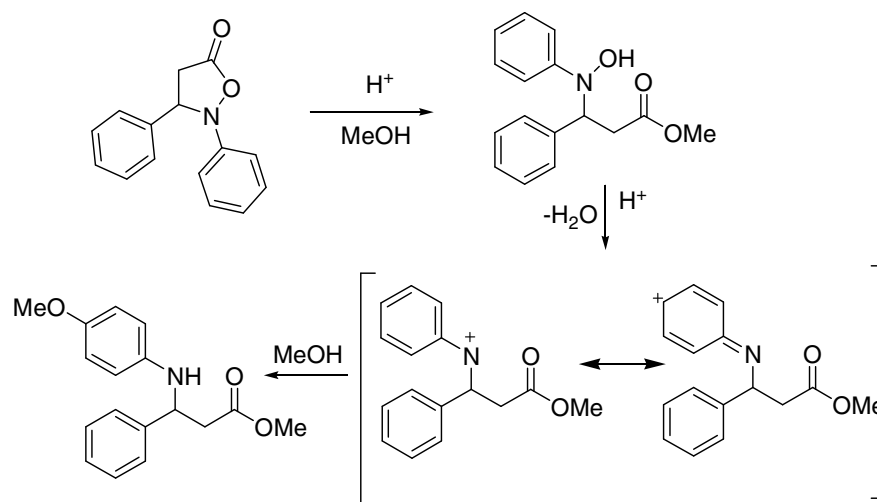

**Chiral catalyst synthesis:**

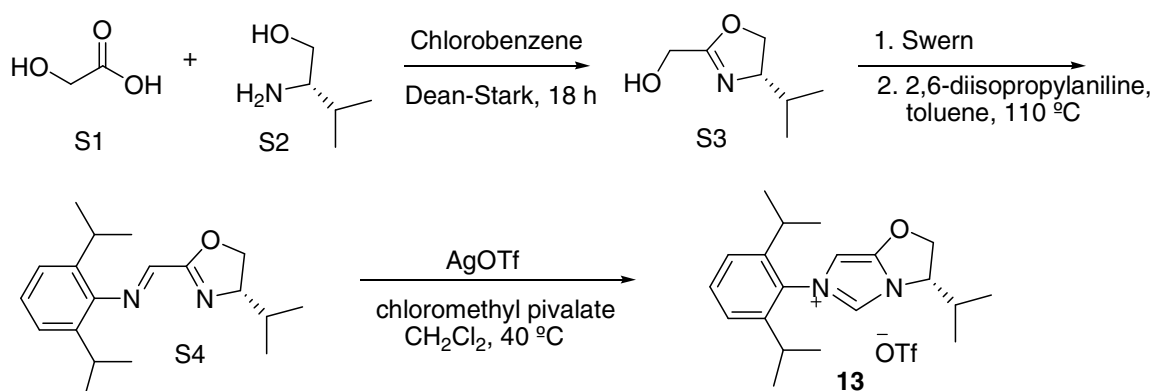

A mixture of valinol **S2** (5 g, 48.5 mmol) and glycolic acid **S1** (4.05 g, 53.3 mmol) in chlorobenzene (500 mL) was subjected to Dean-Stark condition for 18 h at 160 °C. The solvent was evaporated and the residue was distilled using Kugelrohr (120 °C, 1 mmHg) to give the alcohol **S3** as white crystal in 70% yield (4.9 g).  $^1\text{H}$  NMR (400 MHz,  $\text{CDCl}_3$ ) of **S3**:  $\delta$  4.36 (dd,  $J$  = 8.4, 9.5 Hz, 1H,  $\text{CH}_2$ ), 4.25 (br d,  $J$  = 2.8 Hz, 2H,  $\text{CH}_2$ ), 4.07 (t,  $J$  = 8.3 Hz, 1H,  $\text{CH}_2$ ), 3.93 (m, 1H, CH), 3.17 (br s, 1H, OH), 1.76 (octet,  $J$  = 6.7 Hz, 1H, CH), 0.99 (d,  $J$  = 6.8 Hz, 3H,  $\text{CH}_3$ ), 0.90 (d,  $J$  = 6.8 Hz, 3H,  $\text{CH}_3$ ).  $^{13}\text{C}$  NMR (100 MHz,  $\text{CDCl}_3$ ):  $\delta$  168.3 (Cq), 71.4, 70.9 ( $\text{CH}_2$ ), 57.0, 32.4 (CH), 18.8, 18.0 ( $\text{CH}_3$ ). The alcohol **S3** (2 g, 14 mmol) in

CH<sub>2</sub>Cl<sub>2</sub> (25 mL) was slowly added to a stirred dichloromethane (150 mL) solution of dimethyl sulfoxide (1.64 g, 21 mmol) and oxalyl chloride (2.7 g, 21 mmol) at -60 °C. After 30 min, triethylamine (4.24 g, 42 mmol) was slowly added at the same temperature. The reaction mixture was warmed within the next 30 min, quenched with water and extracted with dichloromethane (3 times). The combined extracts were washed with water and dried (Na<sub>2</sub>SO<sub>4</sub>). Without further purification, the aldehyde thus obtained was subjected to imination with 2,6-diisopropylaniline (2.7 g, 15.4 mmol). After refluxing in toluene for 24 h, the solvent was evaporated *in vacuo* from the reaction mixture. The rest of the volatile substance was removed using kugelruhr (140 °C, 1 mmHg) to give the required imine residue S4. <sup>1</sup>H NMR (400 MHz, CDCl<sub>3</sub>) of S4: δ 7.85 (s, 1H, =CH), 7.18–7.14 (m, 3H, Ar-H), 4.54 (dd, *J* = 7.9, 9.2 Hz, 1H, CH<sub>2</sub>), 4.25–4.15 (m, 2H, CH<sub>2</sub>, CH), 2.88 (heptet, *J* = 7.0 Hz, 2H, CH), 1.91 (octet, *J* = 6.7 Hz, 1H, CH), 1.17 (d, *J* = 6.8 Hz, 6H, 2 CH<sub>3</sub>), 1.16 (d, *J* = 6.8 Hz, 6H, 2 CH<sub>3</sub>), 1.08 (d, *J* = 6.8 Hz, 3H, CH<sub>3</sub>), 0.98 (d, *J* = 6.8 Hz, 3H, CH<sub>3</sub>). The residual imine was pure enough (95 %) for the cyclization under Glorius condition.<sup>S1</sup>

(S1) Glorius, F.; Altenhoff, G.; Goddard, R.; Lehmann, C. *Chem. Commun.* **2002**, 2704.

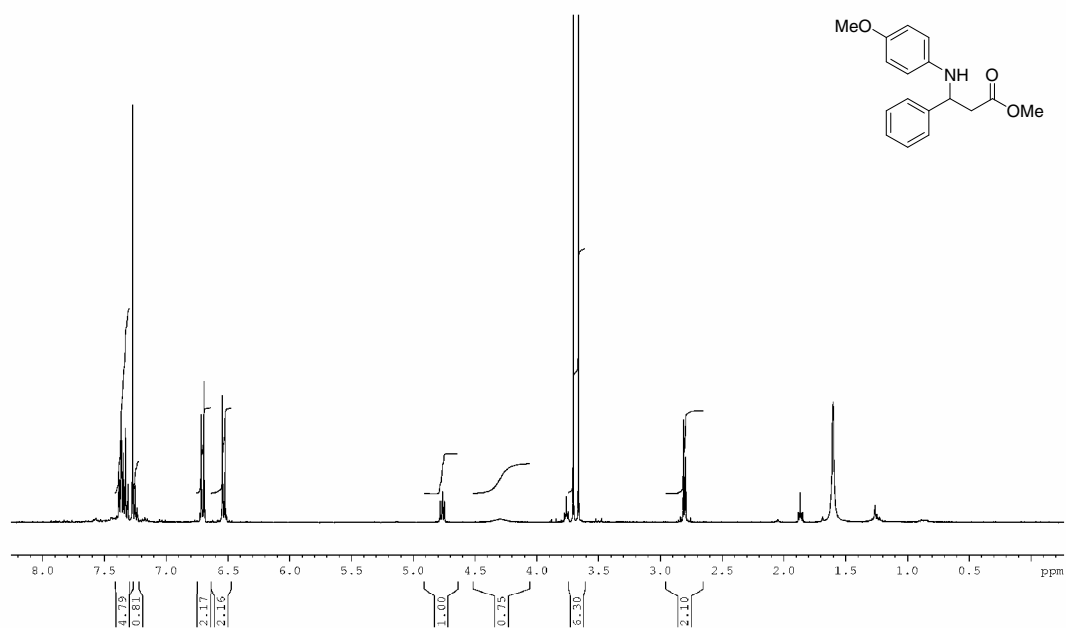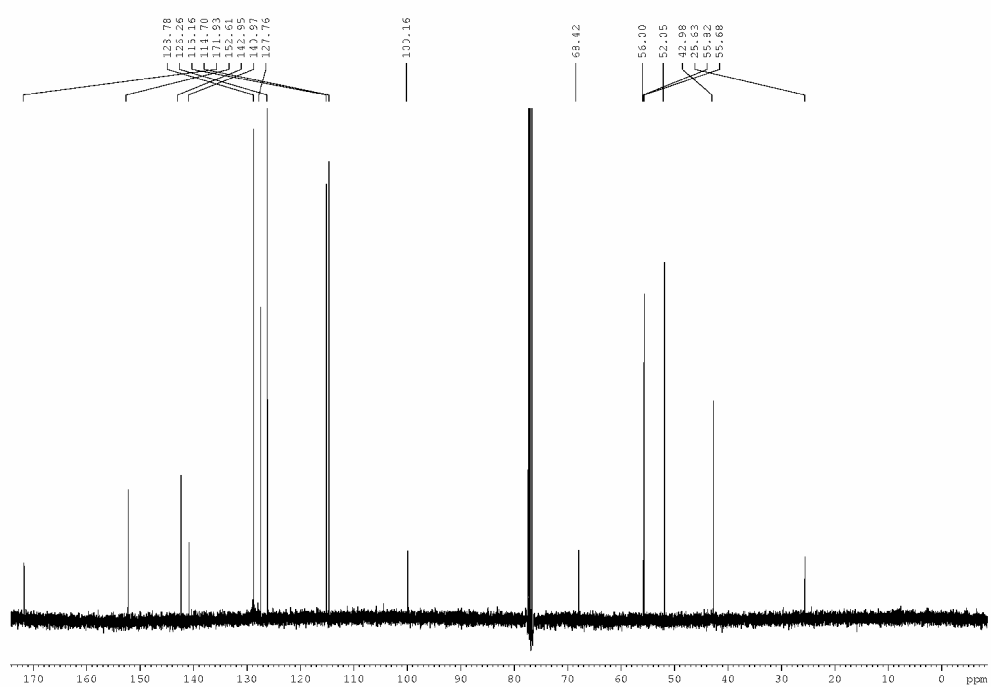

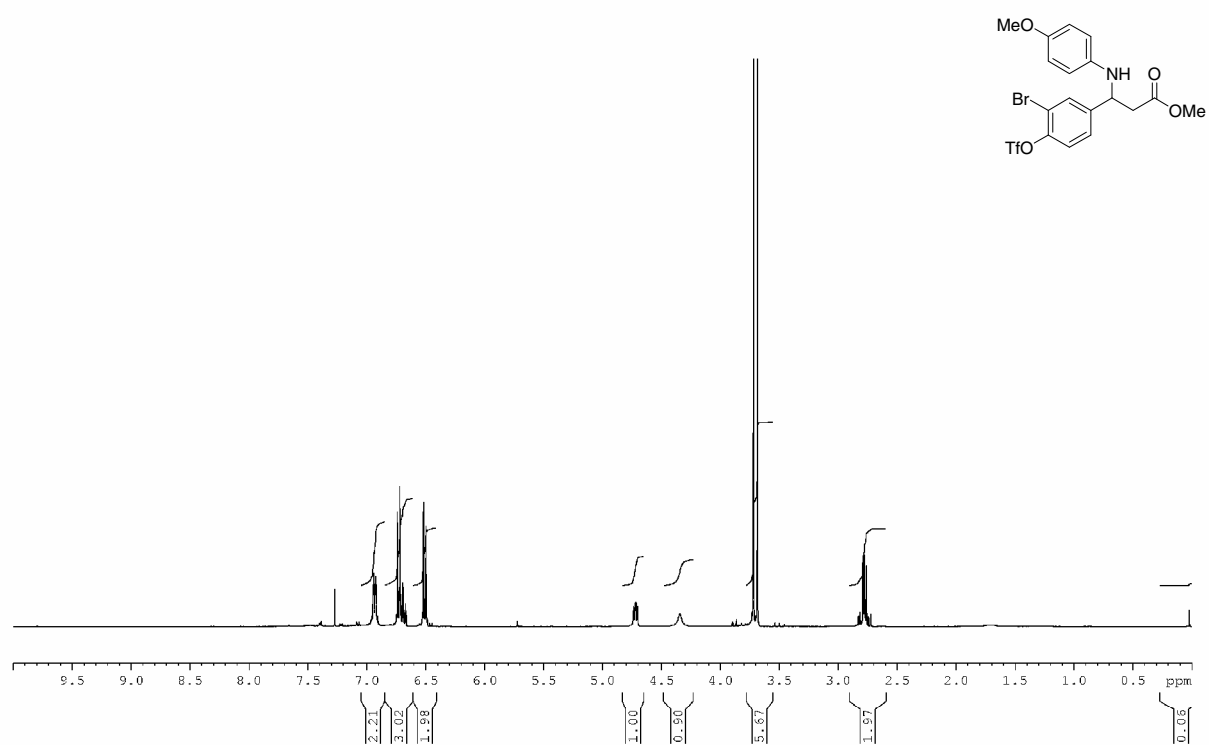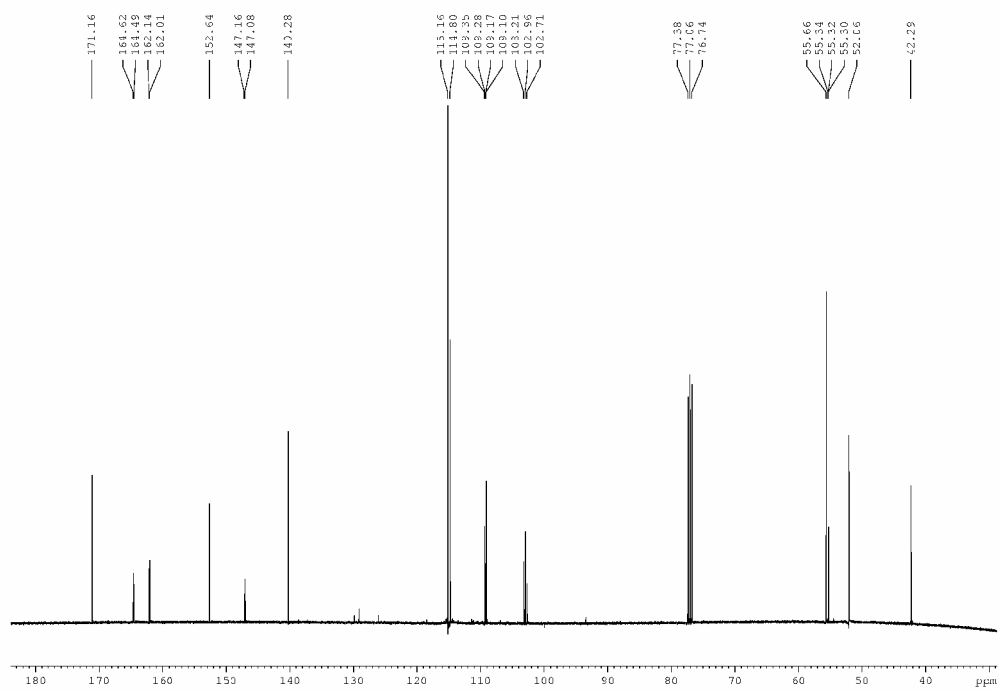

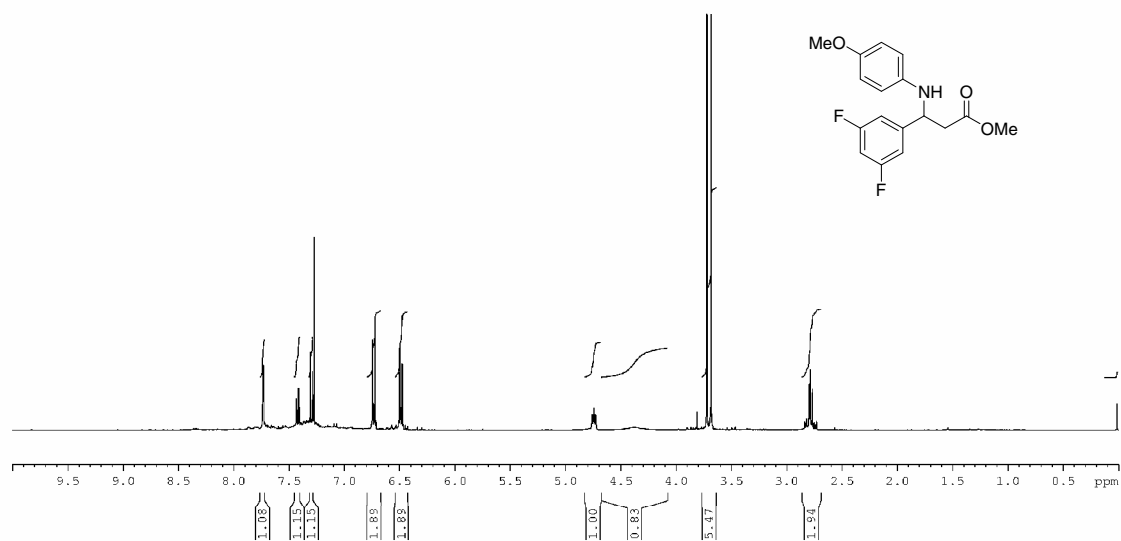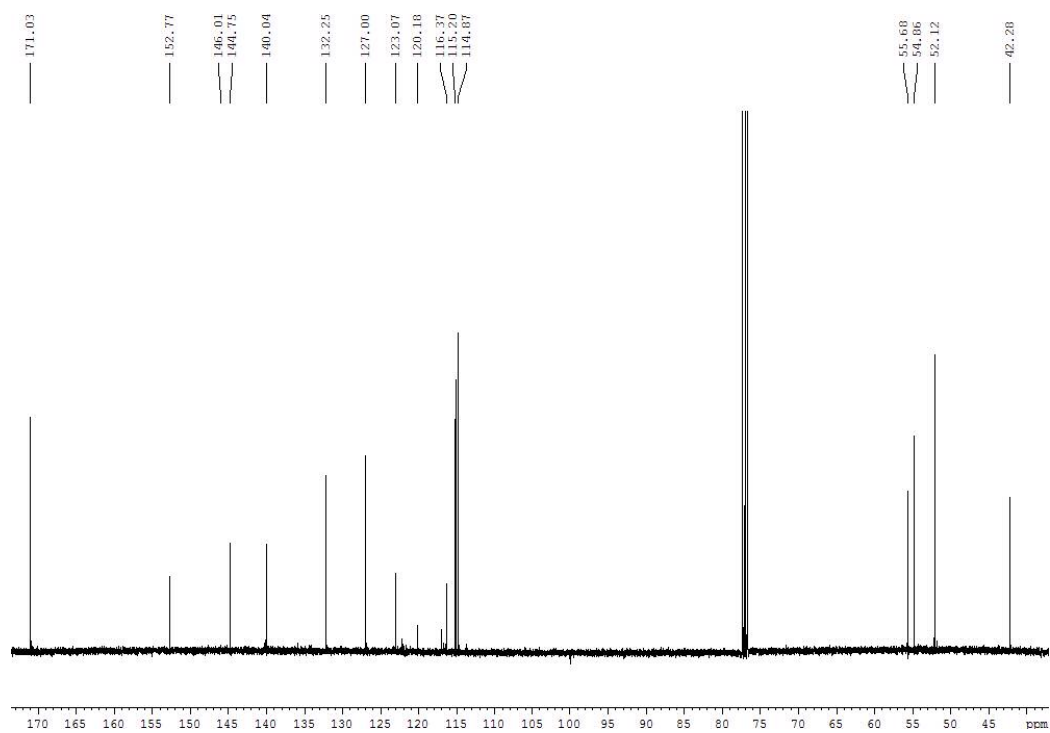

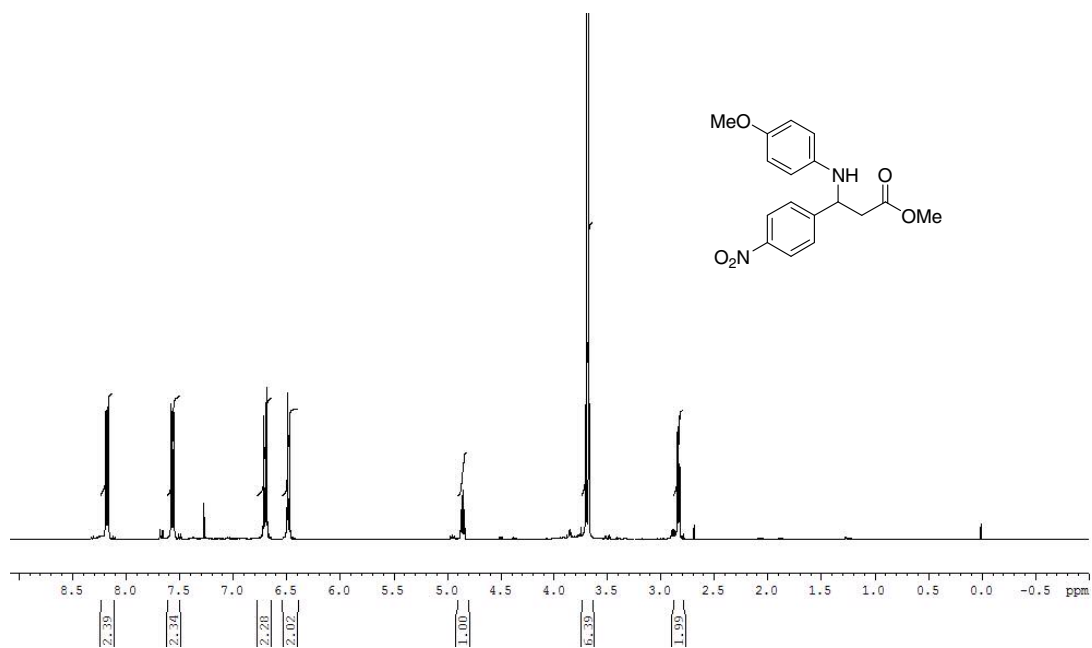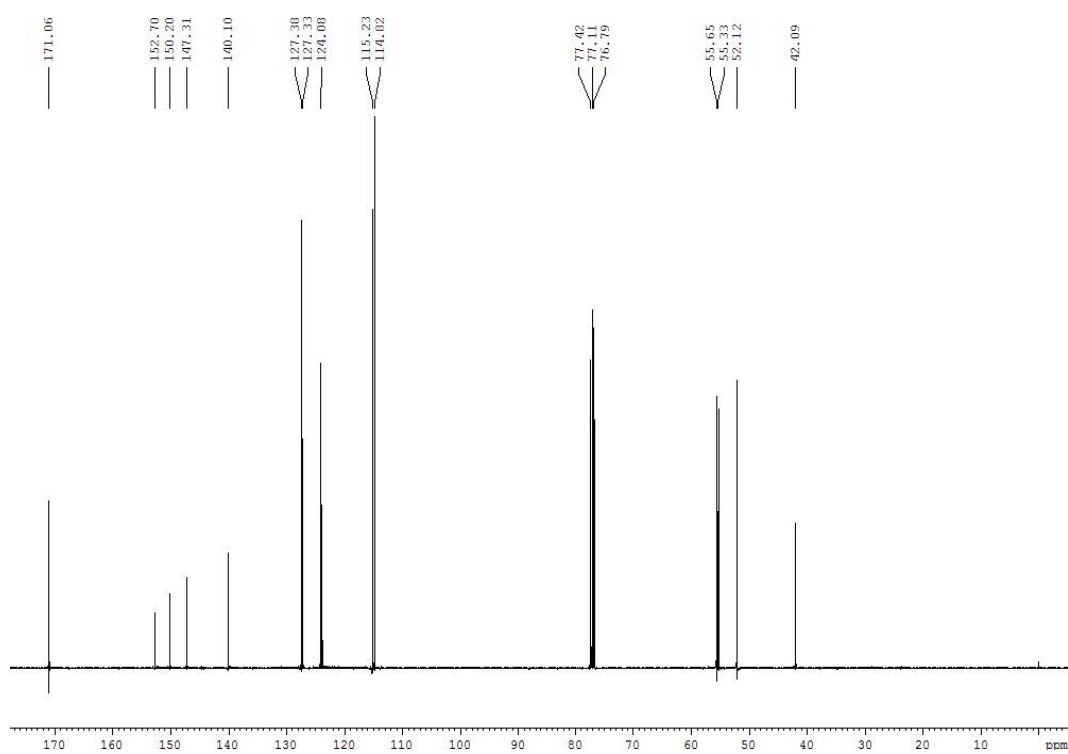

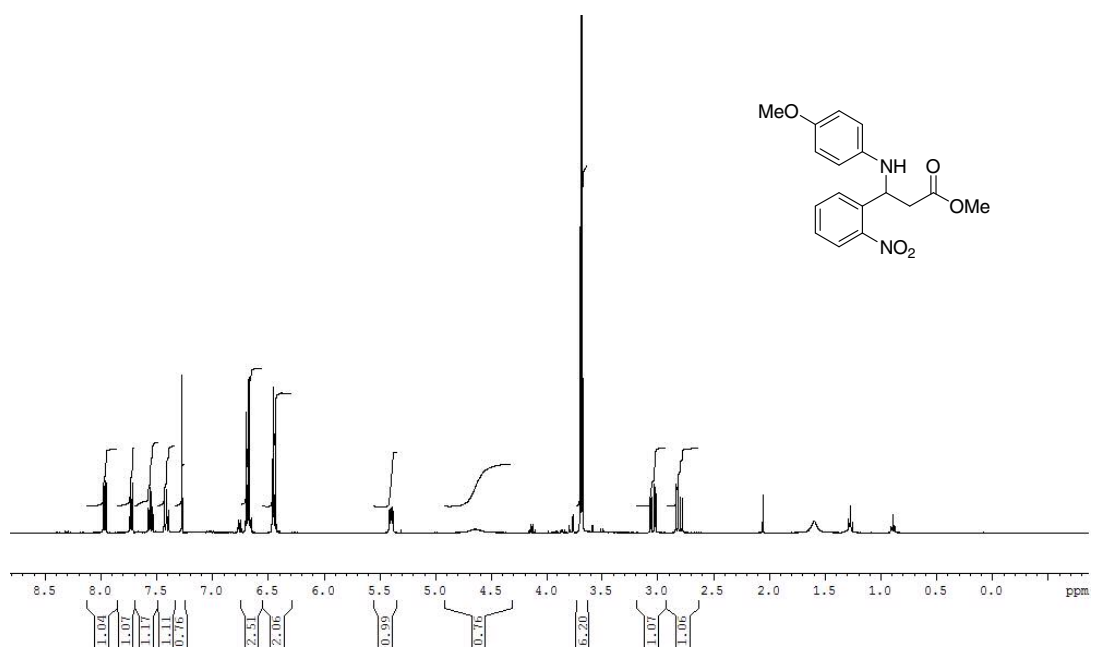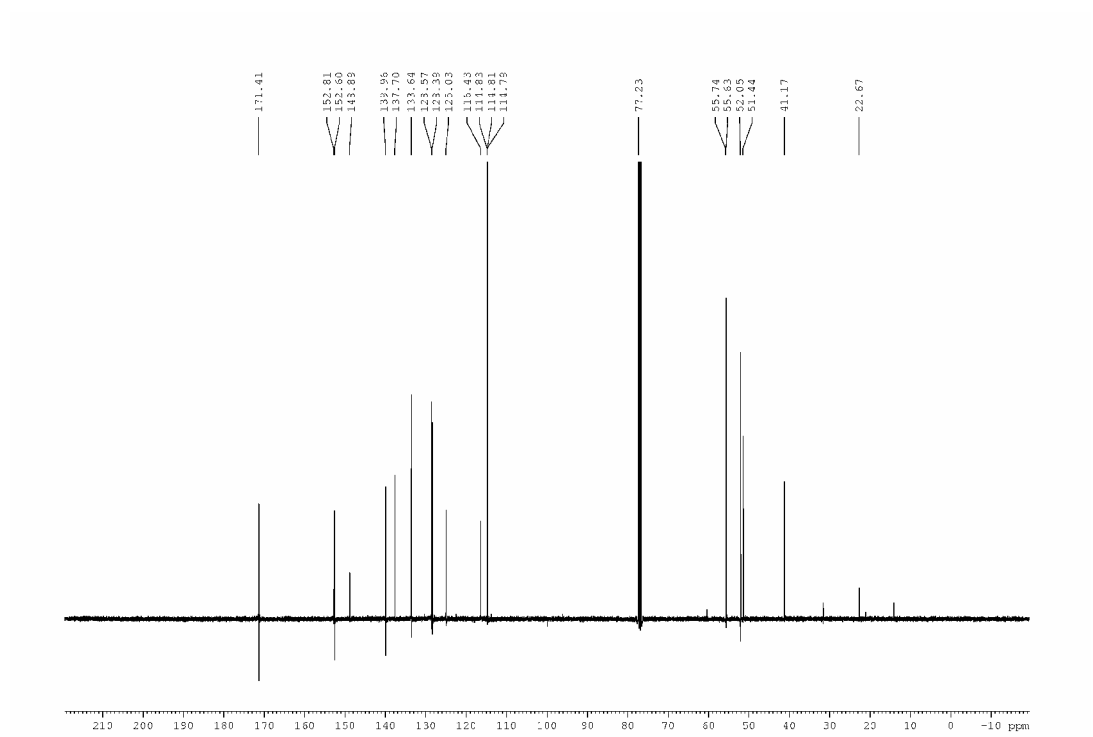

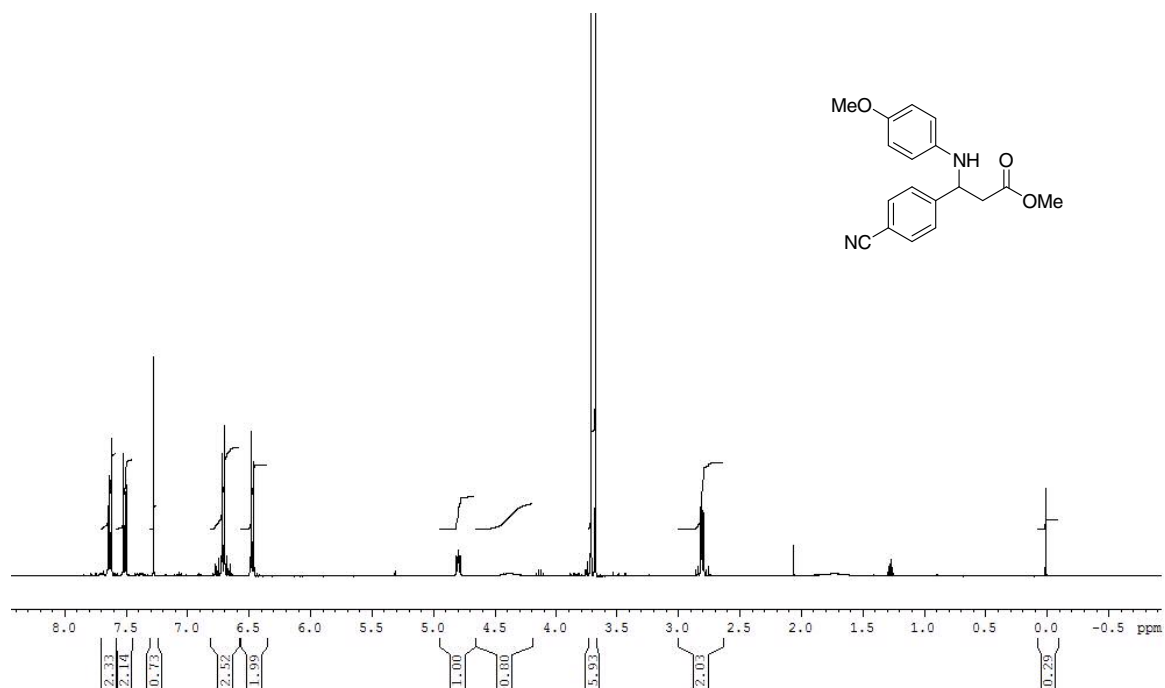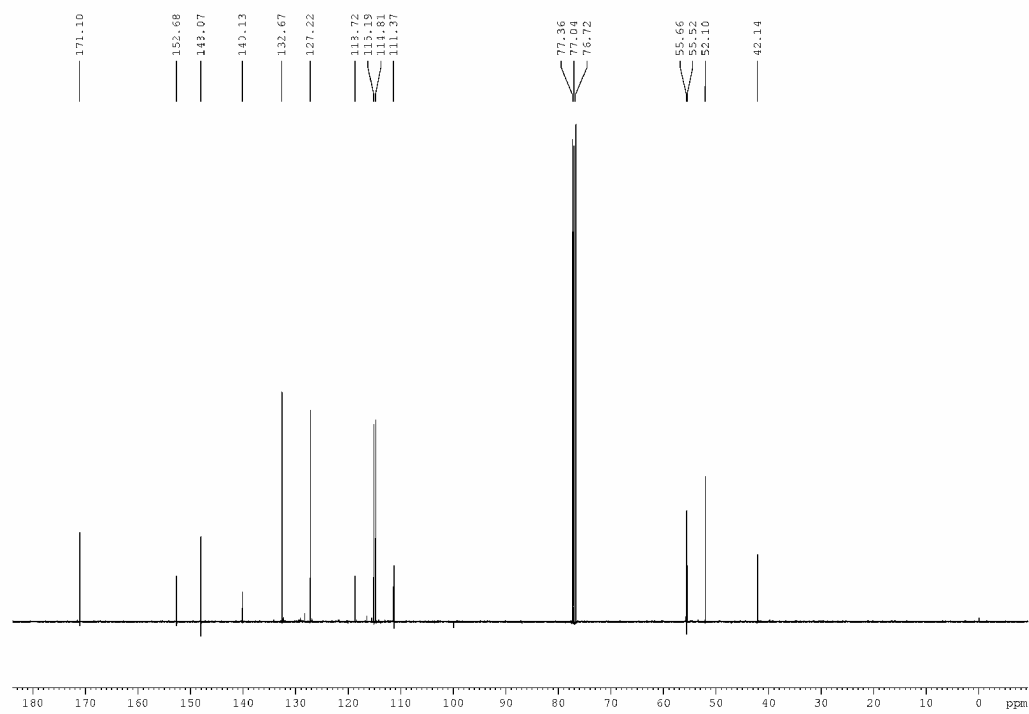

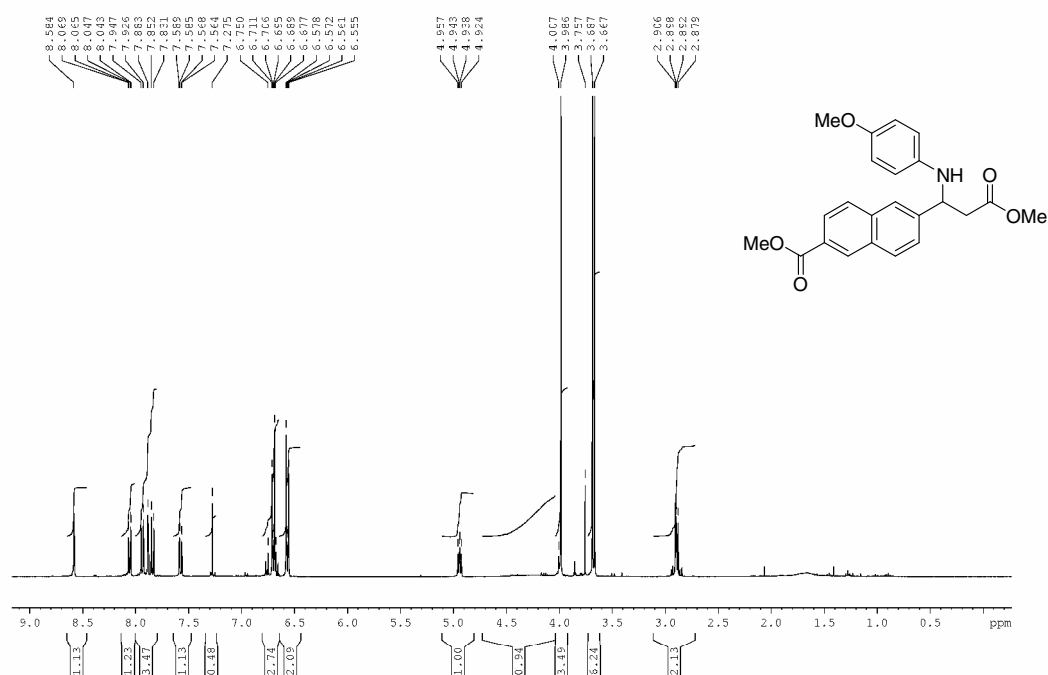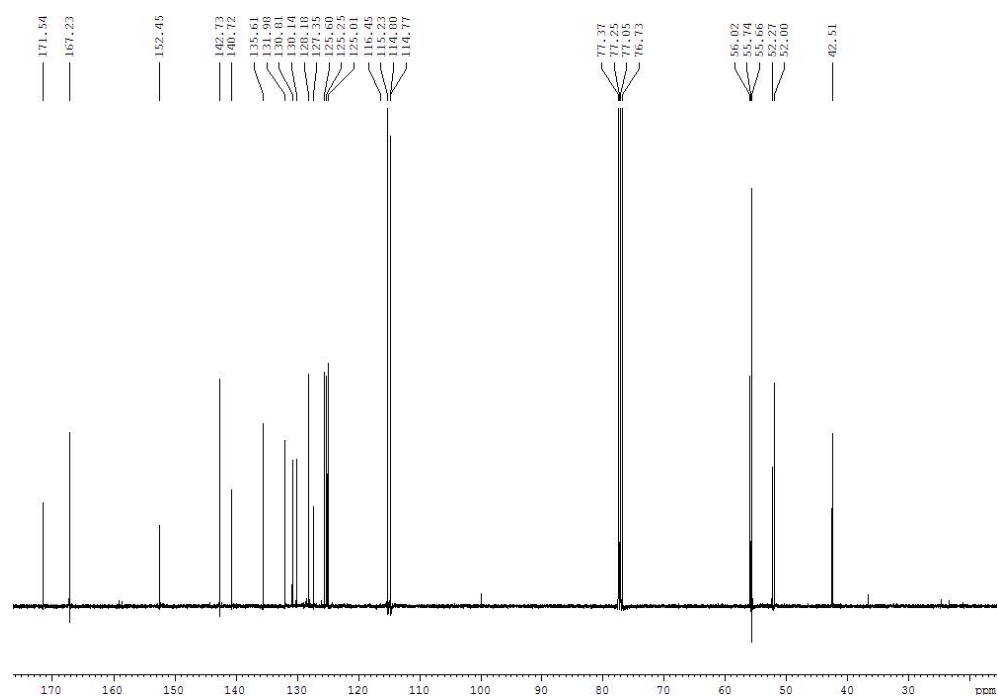

JS-CF3

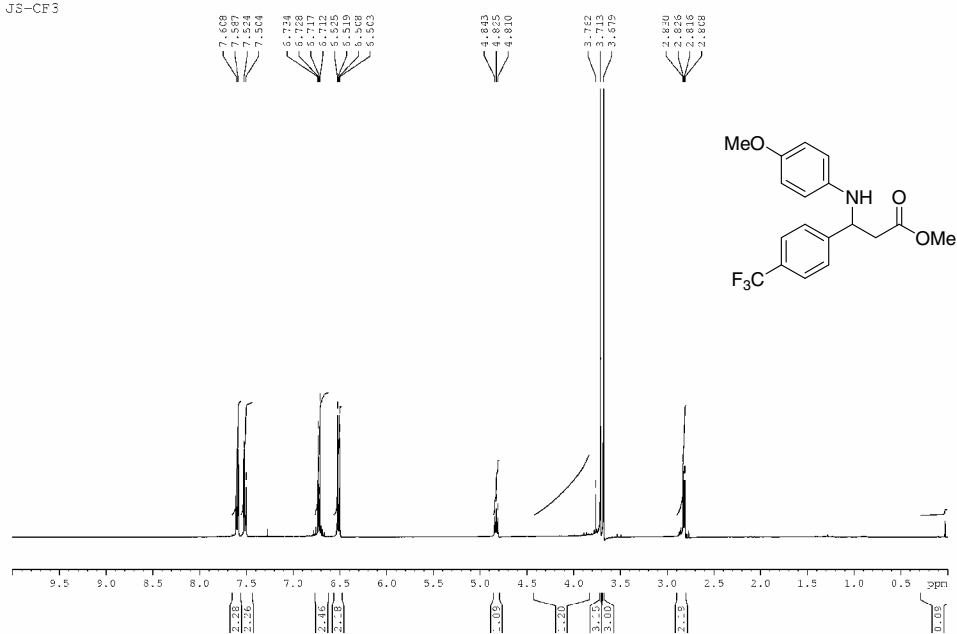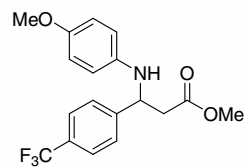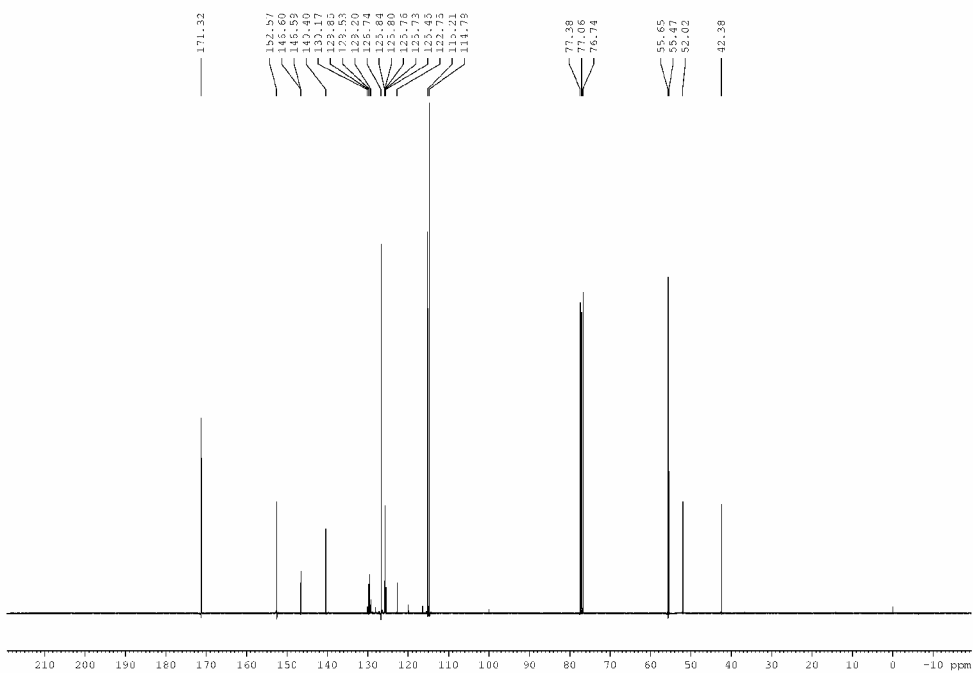

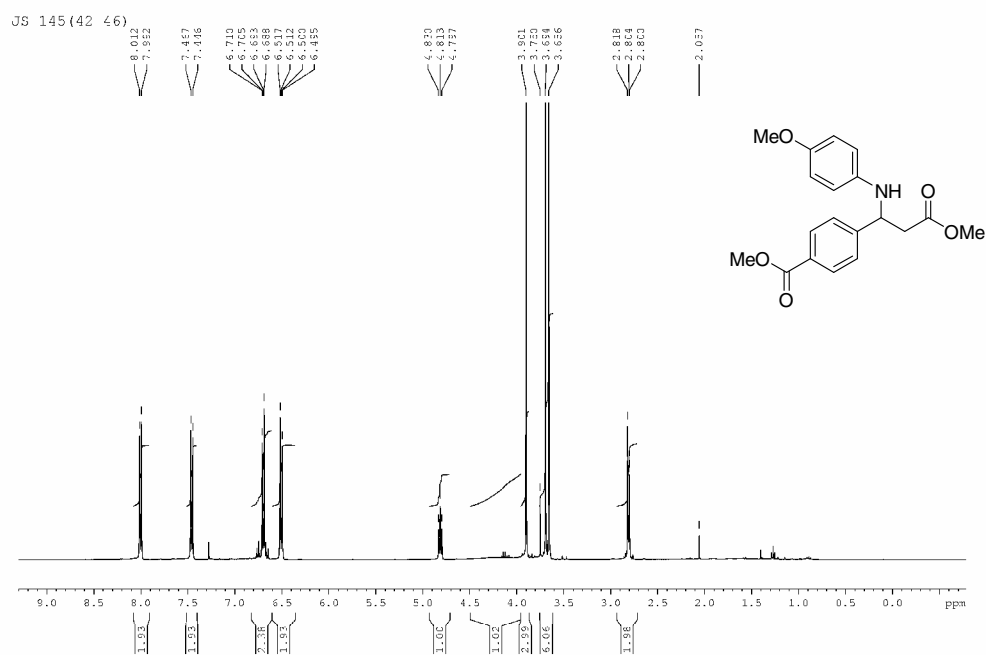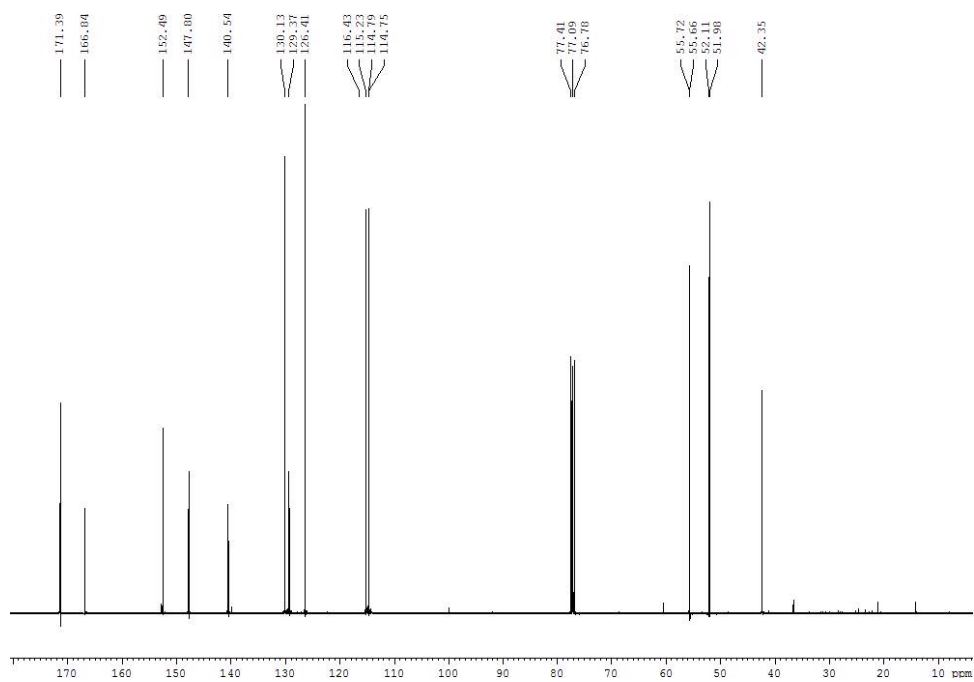

JS-L62-24-31

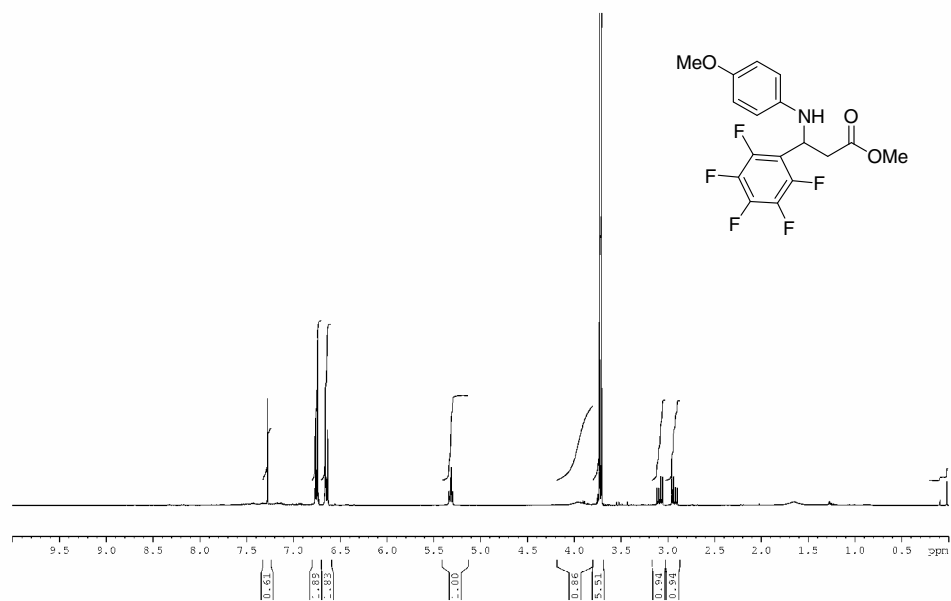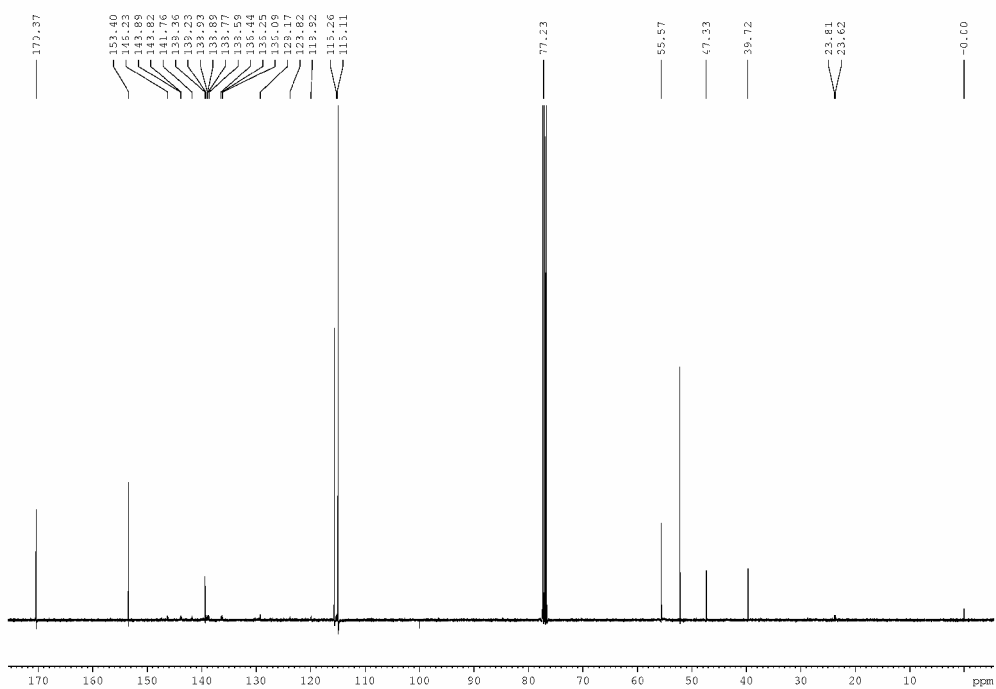

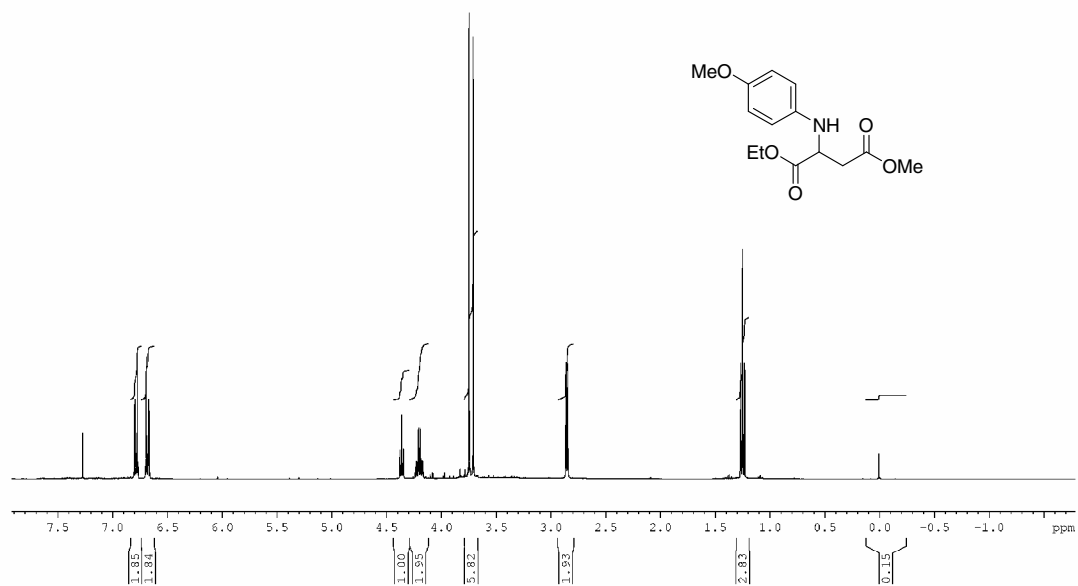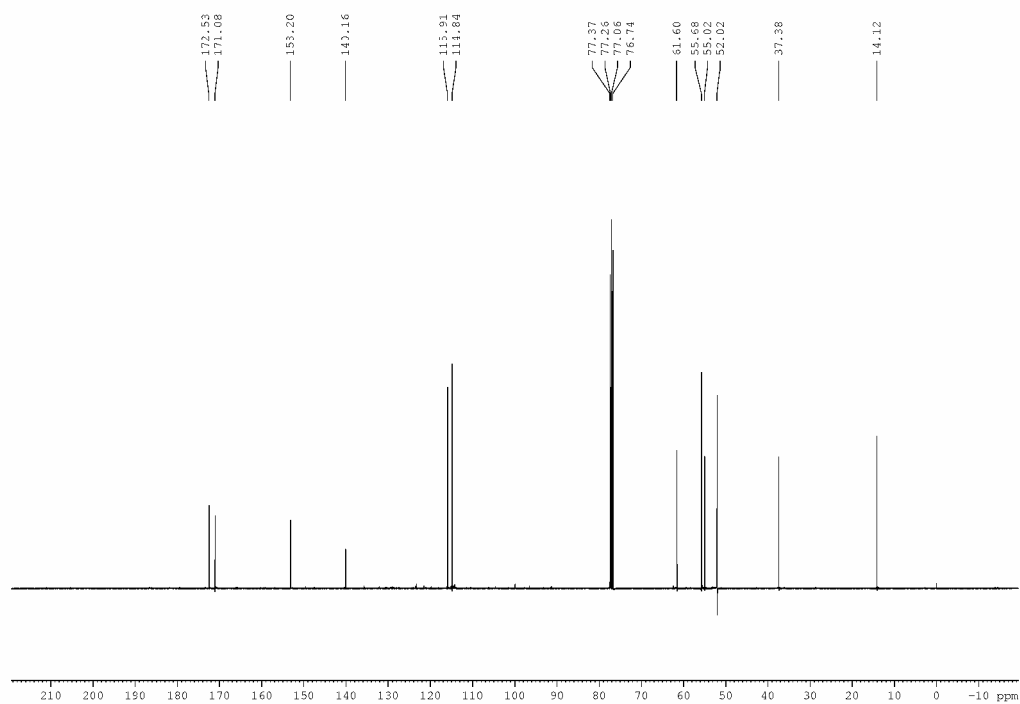

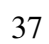

PKP-Hept

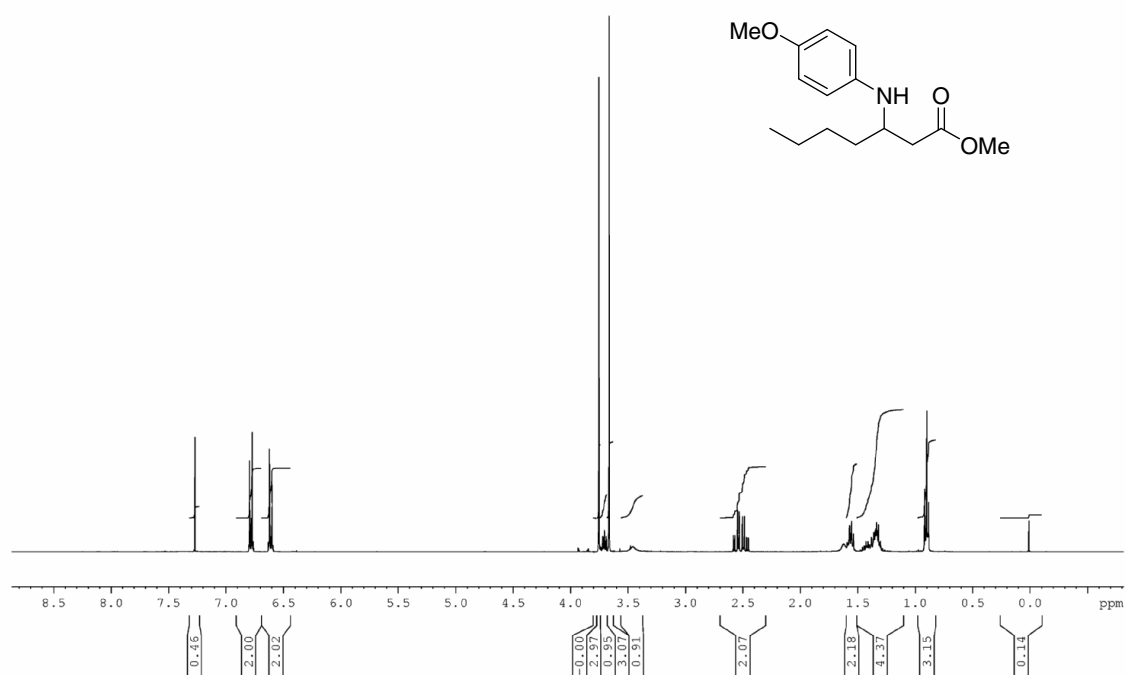

PKP-Hept

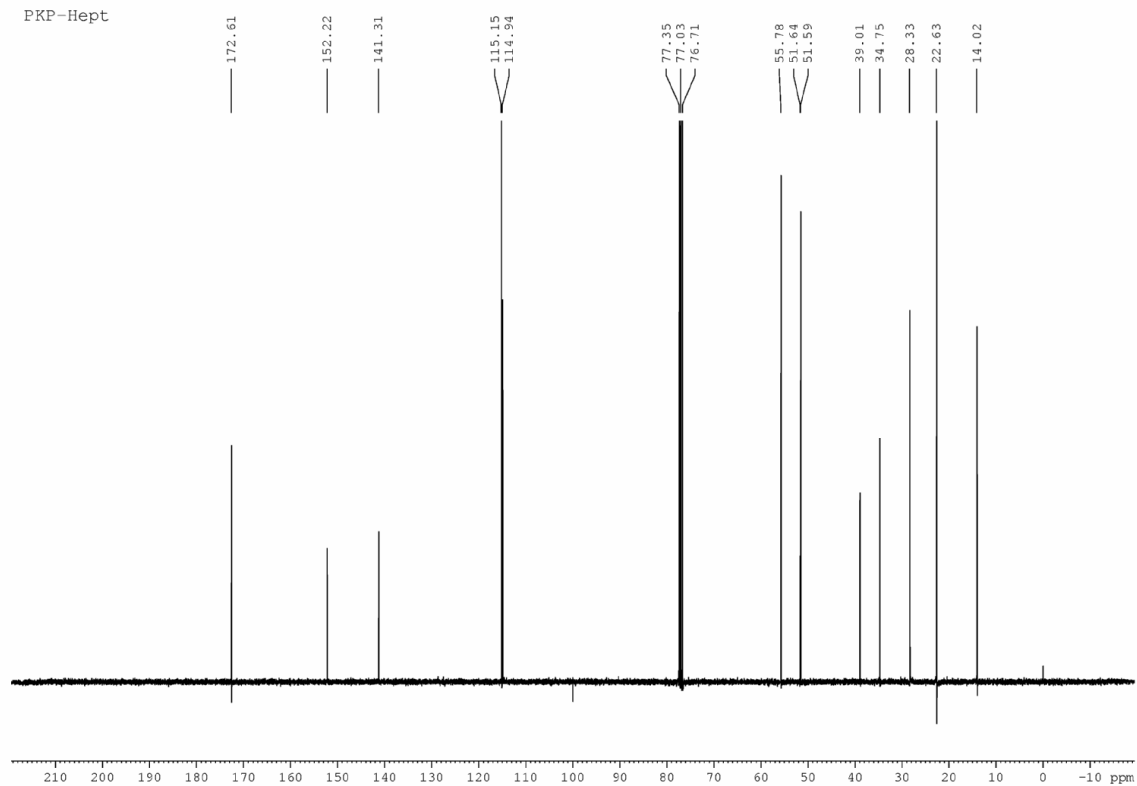

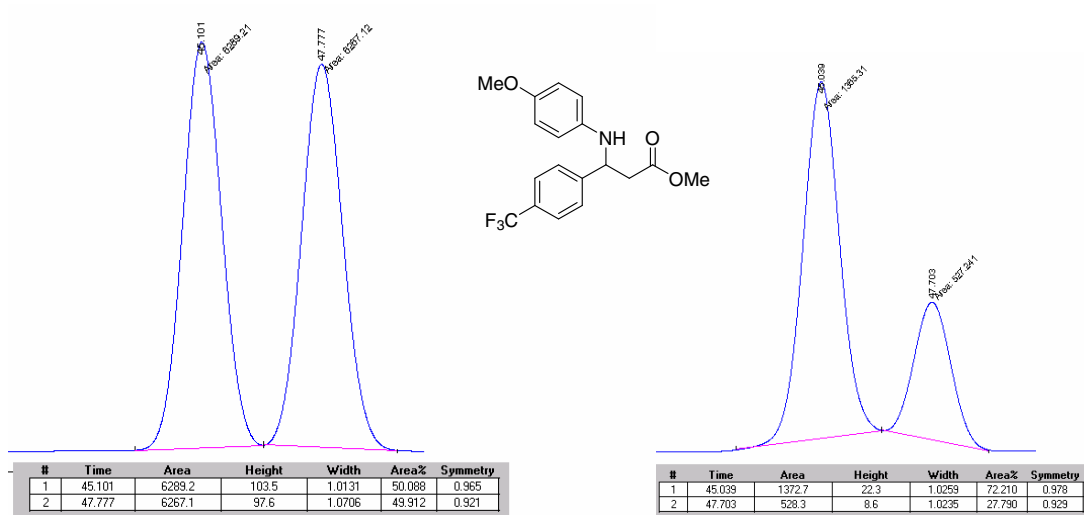

HPLC analysis using CHIRALCEL OD-RH column (45:55 CH<sub>3</sub>CN-H<sub>2</sub>O).
